1 **Ancestral protein reconstruction reveals evolutionary events governing variation in Dicer**  
2 **helicase function.**

3 **Adedeji M. Aderounmu<sup>1</sup>, P. Joseph Aruscavage<sup>1</sup>, Bryan Kolaczowski<sup>2</sup>, Brenda L. Bass<sup>1\*</sup>**

4 **<sup>1</sup>Department of Biochemistry, University of Utah, Salt Lake City, Utah 84112 USA**

5 **<sup>2</sup>Department of Microbiology and Cell Science, University of Florida, Gainesville, Florida**  
6 **32611 USA**

7

8 **Corresponding author: [bbass@biochem.utah.edu](mailto:bbass@biochem.utah.edu)**

9

10

11

12

13

14

15

16

17

18

19

20

21 **Abstract**

22 Antiviral defense in ecdysozoan invertebrates requires Dicer with a helicase domain capable of  
23 ATP hydrolysis. But despite well-conserved ATPase motifs, human Dicer is incapable of ATP  
24 hydrolysis, consistent with a muted role in antiviral defense. To investigate this enigma, we used  
25 ancestral protein reconstruction to resurrect Dicer's helicase in animals and trace the evolutionary  
26 trajectory of ATP hydrolysis. Biochemical assays indicated ancient Dicer possessed ATPase  
27 function, that like extant invertebrate Dicers, is stimulated by dsRNA. Analyses revealed that  
28 dsRNA stimulates ATPase activity by increasing ATP affinity, reflected in Michaelis constants.  
29 Deuterostome Dicer-1 ancestor, while exhibiting lower dsRNA affinity, retained ATPase activity;  
30 importantly, ATPase activity was undetectable in the vertebrate Dicer-1 ancestor, which had even  
31 lower dsRNA affinity. Reverting residues in the ATP hydrolysis pocket was insufficient to rescue  
32 hydrolysis, but including additional substitutions distant from the ATPase pocket rescued  
33 vertebrate Dicer-1's ATPase function. Our work suggests Dicer lost ATPase function in the  
34 vertebrate ancestor due to loss of ATP affinity, involving motifs distant from the active site,  
35 important for coupling dsRNA binding to the active conformation. RLRs important for interferon  
36 signaling, and their competition with Dicer for viral dsRNAs, possibly provided incentive to jettison  
37 an active helicase in vertebrate Dicer.

38

39

40

41

42

43

## 44 Introduction

45 Dicer is a multidomain endoribonuclease that is conserved in most eukaryotes<sup>1–6</sup>. Some  
46 organisms encode only a single Dicer<sup>6–13</sup>, while others encode multiple Dicers<sup>3,4,14,15</sup>, with different  
47 versions specialized for pre-microRNA (pre-miRNA) processing or endogenous/viral double-  
48 stranded (dsRNA) processing<sup>14–23</sup>. Dicer contains an intramolecular dimer of two RNaseIII  
49 domains, the catalytic center that cleaves dsRNA. It also contains a platform/PAZ domain, an N-  
50 terminal helicase domain, a C-terminal dsRNA-binding motif (dsRBM) and a domain of unknown  
51 function (DUF283) with a degenerate dsRBM fold<sup>6,17,24</sup> (Figure 1A). These domains mediate  
52 recognition, binding, and discrimination of different dsRNAs, ensuring that optimal Dicer  
53 substrates are presented to the catalytic center for cleavage. The size of the small RNA product,  
54 either miRNA or small interfering RNA (siRNA), is defined by the distance between the  
55 platform/PAZ domain, which binds the ends of dsRNAs, and the RNaseIII domains<sup>16,25,26</sup>. Like the  
56 platform/PAZ domain, Dicer's helicase domain is capable of binding dsRNA termini, and in some  
57 organisms, the C-terminal dsRBM contributes to substrate binding and cleavage<sup>16,27,28</sup>. Because  
58 both domains bind dsRNA termini, there is potential for the platform/PAZ and the helicase to  
59 compete for dsRNA substrates. To resolve this conflict, some extant metazoan Dicers have  
60 evolved substrate preferences where the platform/PAZ domain is specialized for binding the 2-  
61 nucleotide (nt) 3' overhang (3'ovr) of a pre-miRNA, while the helicase prefers dsRNA with blunt  
62 (BLT) termini<sup>29,30</sup>.

63 The role of the helicase domain varies between different Dicers. In *Drosophila melanogaster*,  
64 Dicer-1 (dmDcr1) specializes in pre-miRNA processing but helicase function is not required<sup>31</sup>  
65 while *Drosophila melanogaster* Dicer-2 (dmDcr2), the second Dicer in fruit flies, uses its helicase  
66 domain to recognize and bind viral and long endogenous dsRNAs<sup>17,27,28,32–34</sup> (Figure 1B). Once  
67 bound, these dsRNAs are threaded by the helicase domain to the RNaseIII sites, using the energy  
68 of ATP hydrolysis for processive cleavage into siRNA products. This processive mechanism

69 ensures that multiple siRNAs are produced from a single dsRNA<sup>27,32</sup>. Another invertebrate Dicer,  
70 *Caenorhabditis elegans* Dicer-1 (ceDCR-1), likewise requires a functional helicase domain to  
71 process long endogenous/viral dsRNAs, but like dmDcr1, it also processes pre-miRNA without a  
72 requirement for ATP<sup>13,29</sup>. In contrast, *Homo sapiens* Dicer (hsDcr) has only been found to function  
73 in an ATP-independent manner, using its platform/PAZ domain to bind pre-miRNAs which are  
74 then distributively cleaved into mature miRNAs (Figure 1C)<sup>24,35</sup>. Accordingly, the role of the single  
75 mammalian Dicer enzyme in antiviral defense is controversial, as sensing of cytosolic viral  
76 dsRNAs is primarily mediated by RIG-I-Like receptors (RLRs), a family of enzymes that contain  
77 a related helicase domain<sup>36-40</sup>. Pathogenic dsRNA recognition by RLRs leads to production of  
78 interferon, which in turn triggers production of multiple antiviral proteins to suppress viral  
79 replication<sup>36,41</sup>. Thus, helicase function in invertebrate Dicers correlates with a role in antiviral  
80 defense that seems to have been replaced by RLRs in mammals.

81 To understand the biochemical basis of the functional diversity between Dicer helicase domains,  
82 and by inference, their roles in antiviral defense, we used phylogenetics to reconstruct evolution  
83 of Dicer's helicase domain in animals. We included DUF283 in our analyses as recent Dicer  
84 structures reveal its role in binding dsRNA in concert with the helicase domain<sup>17,27</sup>. Combining  
85 phylogenetic tree construction, ancestral protein reconstruction (APR), and biochemical analyses  
86 of reconstructed proteins, we show that basal and dsRNA-dependent ATPase function was  
87 present in ancestral animal Dicer, but this capability was lost at the onset of vertebrate evolution.  
88 We also find that ancient Dicer helicases bind dsRNA more tightly than more modern and extant  
89 Dicer helicase domains. dsRNA binding to ancestral Dicer helicases stimulates ATP hydrolysis  
90 primarily by increasing the helicase domain's affinity for ATP, as reflected in differences in  $K_M$   
91 values observed in the absence and presence of dsRNA. Between the ancestor of deuterostomes  
92 and the ancestor of vertebrates, Dicer's helicase domain lost its ability to hydrolyze ATP, while its  
93 dsRNA-binding capability declines even further. Finally, we partially resurrect ATPase function in

94 the ancestral vertebrate Dicer helicase domain and find that loss of ATPase function is driven by  
95 amino acid substitutions distant from the catalytic pocket. We speculate that the unique role of  
96 RLRs in the interferon signaling pathway in vertebrates, and possible competition with Dicer's  
97 helicase for the same viral dsRNAs, created an incentive to jettison an active helicase in  
98 vertebrate Dicer.

## 99 **Results**

### 100 **Phylogenetic analysis of Dicer's helicase domain reveals an ancient gene duplication of** 101 **animal Dicer**

102 Dicer's large size (~220 kDa) and the significant sequence divergence between its homologs and  
103 paralogs (e.g., ~25% identity between hsDcr and dmDcr2), introduces uncertainty into multiple  
104 sequence alignments (MSAs), phylogeny construction, and ancestral protein resurrection<sup>1,28</sup>.  
105 Here we focused our phylogenetic analyses on the helicase domain and DUF283 (HEL-DUF),  
106 two domains involved in functional diversity across metazoan Dicers (Figure 1A). Animal Dicer  
107 sequences were retrieved from NCBI databases and truncated to leave the helicase domain and  
108 DUF283. We used the HEL-DUF sequence alignment to infer a maximum-likelihood phylogenetic  
109 tree and reconstructed the ancestral amino acid sequence on nodes from the tree. The maximum-  
110 likelihood tree revealed an early gene duplication event for HEL-DUF, where one animal Dicer  
111 (AncD1D2) was split into two major Dicer clades, AncD1 and AncD2 (Figure 1D, Figure 1-figure  
112 supplement 1). AncD1 contains the ubiquitous Dicer-1 found in most animal species, while AncD2  
113 contains the arthropod-specific Dicer-2. The observed gene duplication is consistent with  
114 previously reported phylogenetic analyses of full-length Dicer, suggesting that the HEL-DUF  
115 region contained enough phylogenetic signal to recapitulate the broad patterns of Dicer  
116 evolution<sup>1,2,42</sup>.

117 Constraining the maximum-likelihood tree to known species relationships (Figure 1-figure  
118 supplement 2A), caused a few changes in the reconstructed sequences for AncD1D2 and  
119 AncD1<sub>DEUT</sub>, but the variable amino acids are not expected to significantly affect the observed  
120 biochemical properties (96% identity between HEL-DUF tree and species tree reconstruction)  
121 (Figure 1-figure supplement 3A, B). Moreover, APR using the constrained species tree did not  
122 alter the AncD1<sub>VERT</sub> amino acid sequence. Furthermore, constraining arthropod Dicer-2 to a recent  
123 arthropod-specific duplication produces a more parsimonious tree that has been reported to have  
124 significantly worse likelihood scores, indicating that this tree is less likely to represent the Dicer's  
125 true phylogeny (Figure 1-figure supplement 2B)<sup>1</sup>.

126 Select nodes in the maximum likelihood tree were subjected to APR using RAXML-NG. Amino  
127 acid sequences for AncD1D2, AncD2<sub>ARTH</sub>, AncD1<sub>ARTH/LOPH/DEUT</sub>, AncD1<sub>LOPH/DEUT</sub>, AncD1<sub>DEUT</sub> and  
128 AncD1<sub>VERT</sub>, were predicted with a high degree of confidence. AncD1<sub>VERT</sub> had more than 95% of  
129 sites with posterior probabilities of 0.8 or above, while older constructs had an average of 75% of  
130 sites with posterior probabilities above 0.8 (Figure 1-figure supplement 4A). Ancestral constructs  
131 were expressed recombinantly using baculovirus in Sf9 insect cells and purified to 99%  
132 homogeneity (Figure 1-figure supplement 4B)<sup>43</sup>. Protein identity was confirmed with LC/MS/MS.

### 133 **Ancient animal Dicer helicase domain possessed dsRNA-stimulated ATPase function**

134 Certain extant Dicer enzymes have ATP hydrolysis activity, while others do not, suggesting either  
135 a gain or loss of this activity during evolution. To understand the source of this variation, we  
136 performed multiple-turnover ATP hydrolysis assays of ancestral HEL-DUF proteins with and  
137 without dsRNA. We observed ATP hydrolysis in the most recent common ancestor of hsDcr and  
138 dmDcr2, AncD1D2 (Figure 2A), leading to the important conclusion that extant animal Dicercs with  
139 no dependence on ATP, such as hsDcr, lost the capacity for ATP hydrolysis subsequent to this  
140 period in animal evolution. Basal ATP hydrolysis activity was present at low levels in AncD1D2  
141 ( $k_{\text{obs}}$ : 0.06 min<sup>-1</sup>) and was improved upon addition of dsRNA (Figure 2A, Table 1).

142 Adding dsRNA to AncD1D2 showed a dramatic increase in the ADP produced over time (Figure  
143 2A, right panel). To enable better comparison of efficient HEL-DUF ancestors, and minimize  
144 effects of substrate depletion during the reaction, data were modeled as a two-phase exponential  
145 curve. The first phase was represented by a fast linear burst of ATP hydrolysis capturing a  
146 transient zero order reaction where rate is independent of ATP concentration, and the second  
147 phase was modeled as a slow, first order exponential increase in ATP hydrolysis, where, because  
148 of robust hydrolysis, ATP concentration falls below some affinity threshold for the enzyme (Figure  
149 2E, F, Table 1)<sup>44</sup>. Without dsRNA, ATP hydrolysis is a slow first order reaction because the  
150 concentration of ATP in this reaction (100 $\mu$ M) is likely orders of magnitude below the affinity  
151 threshold. Addition of dsRNA with BLT termini to AncD1D2, a substrate designed to mimic termini  
152 of certain RNA viruses, promoted hydrolysis of ATP in the fast phase ( $k_{burst}$ : 14.3  $\mu$ M/min) as well  
153 as doubling the rate constant of the slow phase ( $k_{obs}$ : 0.11  $min^{-1}$ ) (Table 1). Similar rates were  
154 observed when a dsRNA with a 2-nucleotide (nt) 3' overhang (3'ovr) (pre-miRNA mimic), was  
155 used (Table 1). Lack of dsRNA terminus discrimination suggests a substrate promiscuity that is  
156 absent in modern Dicers, where BLT dsRNA is the optimal substrate for the helicase domain<sup>28–</sup>  
157 <sup>30,32</sup>.

158 The arthropod Dicer-2 ancestor, AncD2<sub>ARTH</sub>, was more efficient at hydrolyzing ATP in the absence  
159 of dsRNA than AncD1D2 and all other ancestors tested (Figure 2B, E), showing a two-phase  
160 reaction resembling a dsRNA-stimulated reaction ( $k_{burst}$ : 6.47  $\mu$ M/min,  $k_{obs}$ : 0.05  $min^{-1}$ ; Table 1).  
161 This efficient hydrolysis in the absence of dsRNA suggests that AncD2<sub>ARTH</sub> refined its ATP binding  
162 pocket to produce high affinity for ATP even in the absence of nucleic acid. Addition of BLT dsRNA  
163 increased the rate of the fast phase ( $k_{burst}$ : 19.3  $\mu$ M/min), with slightly better efficiency compared  
164 to 3'ovr dsRNA ( $k_{burst}$ : 14.6  $\mu$ M/min) (Table 1, Figure 2B, F), perhaps foreshadowing the terminus  
165 discrimination seen in modern dmDcr2<sup>30,32</sup>. Interestingly, terminus discrimination was also  
166 observed in Dicer-1 ancestors, suggesting the foundation of this discrimination existed in

167 AncD1D2, even if not observable at the conditions tested. The deuterostome Dicer-1 node  
168 immediately preceding vertebrate Dicer-1, AncD1<sub>DEUT</sub>, had a pattern of basal and dsRNA-  
169 stimulated ATP hydrolysis similar to AncD1D2 (Table 1) (Figure 2C, E, F) but had obvious  
170 differences in the efficiency of hydrolysis triggered by different dsRNA termini (BLT,  $k_{burst}$ : 6.0  
171  $\mu\text{M}/\text{min}$ ; 3'ovr,  $k_{burst}$ : 1.4  $\mu\text{M}/\text{min}$ ) (Table 1).

172 Most importantly, in the ancestor of vertebrate Dicer, AncD1<sub>VERT</sub>, ATP hydrolysis was  
173 undetectable (Figure 2D), consistent with observations that modern hsDcr is incapable of ATP  
174 hydrolysis<sup>35</sup>, and indicating that loss of Dicer ATPase function is a vertebrate-wide phenomenon,  
175 driven by evolutionary events between the deuterostome and vertebrate ancestor. This period in  
176 evolution coincides with whole genome duplications important for vertebrate evolution, the  
177 expansion of the miRNA repertoire and their role in gene regulation, and most critically, the advent  
178 of the interferon molecule and its role in innate immunity<sup>45-48</sup>.

### 179 **Ancestral HEL-DUF binds dsRNA with higher affinity than modern Dicer HEL-DUF**

180 Our experiments indicated that dsRNA improves ATP hydrolysis by ancient Dicer helicase  
181 domains, in some cases in a terminus-dependent manner. We wondered if terminus  
182 discrimination occurred during initial dsRNA binding. To investigate the dsRNA•HEL-DUF  
183 interaction, as well as how it is affected by ATP, we used electrophoretic mobility shift assays  
184 (EMSAs) with HEL-DUFs to measure the dissociation constant ( $K_d$ ) in the presence and absence  
185 of ATP, using BLT or 3'ovr dsRNA (Figure 3A)<sup>49,50</sup>.

186 All ancestral proteins bound dsRNA and showed multiple shifts that typically decreased in mobility  
187 with increasing protein concentration. AncD1D2, the most ancient construct tested, displayed tight  
188 binding to BLT dsRNA without ATP ( $K_d$ , 3.4nM), while the addition of 5mM ATP caused a 2-fold  
189 reduction in affinity ( $K_d$ , 6.4nM; Table 2, Figure 3B, H). Binding to 3'ovr dsRNA was similarly tight,  
190 albeit with an ~2-fold reduction in binding affinity compared to BLT in the absence or presence of



191 ATP (Table 2, Figure 3C, H). This suggests that dsRNA binding is the earliest point of terminus  
192 discrimination for ATP hydrolysis with ancestral HEL-DUFs. Possibly, the observed lower affinity  
193 with ATP occurs because ATP hydrolysis promotes dissociation, or translocation that results in  
194 HEL-DUF sliding off dsRNA.

195 An obvious feature evident from the binding isotherms (Figure 3H) was that the more ancient the  
196 HEL-DUF construct in our tree, the tighter its interaction with dsRNA, regardless of the presence  
197 or absence of ATP. Comparison of  $K_d$  values (Table 2) revealed other interesting trends.  
198 AncD1<sub>DEUT</sub>, the common ancestor of deuterostomes, which include humans, had a lower binding  
199 affinity for dsRNA compared to AncD1D2, regardless of termini or the presence of ATP (~10-50-  
200 fold, Table 2, Figure 3D, H). In addition, the ability to distinguish BLT and 3'ovr dsRNA largely  
201 disappeared, and ATP had little effect on dsRNA binding (Table 2, Figure 3E, H). This absence  
202 of discrimination between termini or ATP-bound states stands in contrast to observations for  
203 AncD1D2 and extant *Drosophila melanogaster*, whose helicase domains bind BLT dsRNA better  
204 than 3'ovr dsRNA<sup>28,33</sup>. Also, this lack of discrimination in binding does not match the sensitivity to  
205 dsRNA termini observed in ATP hydrolysis (Figure 2C), suggesting an additional discriminatory  
206 step exists between initial dsRNA binding and ATP hydrolysis. Another possibility is that for some  
207 constructs but not for others, ATP's effect on dsRNA binding is muted or altered at the low  
208 temperatures (4°C) where EMSAs were performed.

209 Binding of dsRNA to AncD1<sub>VERT</sub> resembled binding to AncD1<sub>DEUT</sub> in that affinity did not depend on  
210 termini or ATP (Table 2, Figure 3F, G, H). However, AncD1<sub>VERT</sub> binding to dsRNA was weaker  
211 across all conditions with ~4.5-fold reduction in affinity compared to AncD1<sub>DEUT</sub>, and ~30-150-fold  
212 reduction compared to AncD1D2 (Table 2). Interestingly, the  $K_d$  values measured for AncD1<sub>VERT</sub>  
213 were similar to values reported for the modern hsDcr helicase domain, or hsDcr with the  
214 platform/PAZ domain mutated to abolish competing binding, hinting that this construct correlates  
215 with extant biology<sup>51,52</sup>. One possibility is that during evolution, vertebrate HEL-DUF's affinity

216 decreased as the platform/PAZ domain began to play a more significant role in binding 3'ovr  
217 termini of pre-miRNAs, and RLRs co-opted binding of virus-like BLT dsRNAs. In summary, the  
218 more ancient the HEL-DUF construct in our tree, the tighter the dsRNA•HEL-DUF interaction, with  
219 the deuterostome HEL-DUF ancestor losing the ability to discriminate dsRNA termini by binding.

## 220 **BLT dsRNA improves ATP hydrolysis by improving the association of ATP to HEL-DUF**

221 Our analyses so far showed that dsRNA markedly altered the kinetics and efficiency of ATP  
222 hydrolysis. To understand how dsRNA binding affected the interaction of the helicase with ATP,  
223 we performed Michaelis-Menten analyses. We focused on determining kinetics for ATP hydrolysis  
224 catalyzed by AncD1D2 and AncD1<sub>DEUT</sub>, to gain information about two Dicer-1 ancestors separated  
225 by vast evolutionary distance. Without added dsRNA, basal ATP hydrolysis for AncD1D2 had a  
226  $k_{cat}$  of 1117 min<sup>-1</sup> and a  $K_M$  of 35.8mM (Table 3, Figure 4A, Figure 4-figure supplement 1). Adding  
227 excess BLT dsRNA caused  $k_{cat}$  to drop ~8 fold to 147.8 min<sup>-1</sup> while  $K_M$  dropped ~140-fold to  
228 0.26mM, indicating that although binding of BLT dsRNA to the AncD1D2 causes a reduction in  
229 the ATP turnover efficiency, it concurrently triggers a tighter association with ATP, leading to ~19-  
230 fold net improvement in  $k_{cat}/K_M$  (Table 3). This improvement in efficiency is primarily evident at  
231 lower ATP concentrations that fall in the range of intracellular ATP concentrations<sup>53</sup>. (Figure 4A,  
232 right panel). These observations also explain the appearance of the fast linear phase in the  
233 multiple-turnover hydrolysis reactions performed with 100μM ATP (Table 1, Figure 2). At this  
234 “lower” ATP concentration, we speculate that dsRNA binding causes a conformational change in  
235 the helicase domain that allows tighter association with ATP, enabling a more efficient hydrolysis  
236 reaction, until ATP concentration falls below a threshold where the reaction slows. Without  
237 dsRNA, only slow ATP hydrolysis is available as the helicase rarely samples the conformations  
238 that allow tight interactions with ATP.

239 For the AncD1<sub>DEUT</sub> construct, basal hydrolysis proceeded with a  $k_{cat}$  of 144.1 min<sup>-1</sup>, ~8-fold lower  
240 than the rate recorded for the AncD1D2 reaction (Table 3, Figure 4B, Figure 4-figure supplement  
241 1C). Association of ATP with the AncD1<sub>DEUT</sub> construct, as measured by  $K_M$ , was ~14-fold tighter  
242 leading to similar  $k_{cat}/K_M$  values for both enzymes in the absence of dsRNA (Table 3). Adding BLT  
243 dsRNA caused a reduction in  $k_{cat}$  by a factor of ~4, while reducing  $K_M$  by a factor of ~8 to give a  
244 2-fold net increase in  $k_{cat}/K_M$  (Table 3, Figure 4B, Figure 4-figure supplement 1D). As with the  
245 AncD1D2 construct, improvement is primarily mediated by improved association of enzyme with  
246 ATP, evident at lower ATP concentrations (Figure 4B, right panel). Thus, we observed a trend  
247 where saturation of the helicase domain with BLT dsRNA caused improved ATP association to  
248 the catalytic ATPase site.

#### 249 **Reversing historical substitutions in AncD1<sub>VERT</sub> partially rescued ATP hydrolysis**

250 To acquire insight into the reason for loss of function in the ancestor of vertebrate Dicer,  
251 AncD1<sub>VERT</sub>, we compared Michaelis-Menten kinetics of AncD1<sub>VERT</sub> and AncD1<sub>DEUT</sub>. However,  
252 even at higher protein concentrations (5μM), it was impossible to confidently discern whether  
253 AncD1<sub>VERT</sub> produced a signal over background using our TLC-based assay (data not shown).  
254 Thus, we compared amino acid sequences of ancestral HEL-DUFs that retained ATPase activity  
255 to the sequence of the inactive vertebrate HEL-DUF ancestor, and identified substitutions that  
256 might be responsible for the loss of activity (Figure 4-figure supplement 2). ATP hydrolysis and  
257 dsRNA-binding data for the gene tree-species tree incongruent nodes, AncD1<sub>ARTH/LOPH/DEUT</sub> and  
258 AncD1<sub>LOPH/DEUT</sub>, proved useful here, allowing a deeper analysis of sequence-function relationships  
259 of Dicer's helicase domain (Figure 4-figure supplement 3, 4). We created variants of AncD1<sub>VERT</sub>,  
260 each with a subset of these substitutions, and purified two constructs, AncD1<sub>VERT.1</sub> and  
261 AncD1<sub>VERT.7</sub> (Figure 4-figure supplement 2). In AncD1<sub>VERT.1</sub>, we reverted 20 amino acids which  
262 were either close to ATP binding/hydrolysis amino acid residues or to the ATPase active site in  
263 the tertiary structure, but this construct remained devoid of ATPase activity (data not shown).

264 However, in AncD1<sub>VERT.7</sub>, a construct containing an additional 21 amino acid substitutions distant  
265 from the catalytic site, ATPase activity was rescued, and we measured its Michaelis-Menten  
266 kinetics. Basal ATP hydrolysis had a  $k_{cat}$  of 257.7 min<sup>-1</sup> and a  $K_M$  of 61.7mM (Table 3, Figure 4C,  
267 Figure 4-figure supplement 1E). Enzyme turnover was more efficient than AncD1<sub>DEUT</sub>, but less  
268 efficient than AncD1D2, suggesting a rescue of the enzyme's inherent catalytic activity. However,  
269 the high  $K_M$  value indicated that AncD1<sub>VERT.7</sub> was not rescued for a tight association with ATP,  
270 and the  $k_{cat}/K_M$  value for this construct was ~10-fold lower than  $k_{cat}/K_M$  for both AncD1<sub>DEUT</sub> and  
271 AncD1D2 (Table 3). Adding BLT dsRNA caused  $k_{cat}$  to drop ~10-fold to 24.9min<sup>-1</sup> while improving  
272 the  $K_M$  by ~12-fold, therefore yielding no net improvement in  $k_{cat}/K_M$ . (Table 3, Figure 4C, Figure  
273 4-figure supplement 1F). Our observations indicate that we have partially rescued ATPase activity  
274 in vertebrate HEL-DUF as well as the conformational changes that occur upon dsRNA binding.  
275 AncD1<sub>VERT.1</sub>, constructed by reversing candidate amino acid substitutions close in proximity to the  
276 conserved ATPase motifs, did not rescue ATPase activity. Instead, we found that amino acids  
277 distant from the ATP binding pocket were essential for resurrecting ATP hydrolysis in the  
278 vertebrate ancestor of Dicer.

## 279 Discussion

280 Phylogenetic tools have been used to analyze the evolution of the platform/PAZ domain in plant  
281 and animal Dicers (Figure 1A), shedding light on one source of functional diversity in eukaryote  
282 Dicer<sup>1</sup>. Here we focused on evolution of Dicer's helicase domain in animals. An ATP-dependent  
283 helicase domain is important for Dicer's antiviral role in invertebrates such as dmDcr2 and ceDCR-  
284 1, while mammalian Dicer has not been observed to require ATP<sup>29,54-56</sup>. One model is that  
285 mammalian Dicer's helicase domain exists to stabilize the interaction of pre-miRNAs with the  
286 platform/PAZ domain during processing to mature miRNAs<sup>24,26,57</sup>. Arthropods and nematodes are  
287 invertebrate ecdysozoan protostomes, and so far, these are the only two phyla where Dicer's  
288 helicase domain is known to be essential for antiviral defense. Is this property specific to

289 Ecdysozoa or is it more widespread among other invertebrates and bilaterians? Why is it absent  
290 in mammalian Dicer? The catalytic motif in this family of helicases is the DECH box, also known  
291 as motif II<sup>58,59</sup>. The DECH box is conserved between arthropods, nematodes and mammals but  
292 significant divergence in amino acid sequence of hsDcr, dmDcr2, and ceDCR-1, makes it  
293 challenging to answer these questions simply by analyzing amino acid variation. By performing  
294 APR, we generated evolutionary intermediates that revealed more subtle changes in amino acid  
295 variation and biochemical function, allowing insight into the biochemical properties of the ancient  
296 helicase domain and how these evolved to give rise to extant Dicer's roles in gene regulation and  
297 antiviral defense. The robust sequence-function analysis of Dicer's helicase domain provided by  
298 APR also allowed us to probe a larger sequence space that may not exist in any ancient or extant  
299 Dicers, as is the case for gene tree-species tree incongruent nodes like AncD1<sub>ARTH/LOPH/DEUT</sub> and  
300 AncD1<sub>LOPH/DEUT</sub>.

### 301 **Ancestral animal Dicer possessed an active helicase domain**

302 Our analysis revealed that AncD1D2, the common ancestor of dmDcr2, hsDcr, and ceDCR-1,  
303 retained the capability to hydrolyze ATP (Figure 2A). In addition, our phylogeny construction,  
304 performed with the helicase domain and DUF283, recapitulates the early gene duplication event  
305 reported previously in phylogenetic studies of full-length Dicers (Figure 1D)<sup>1,2</sup>. Plants and fungi  
306 have been reported to have Dicer or Dicer-like proteins with active helicase domains<sup>4,17</sup> so it  
307 stands to reason that early animal Dicer descended from an ancestral eukaryotic Dicer with an  
308 active helicase<sup>60</sup>. The ATP hydrolysis observed in our Dicer ancestors are predicted to be coupled  
309 to some motor function as observed in extant arthropod Dicer-2. Future studies will determine if  
310 these constructs couple ATP hydrolysis to translocation and/or unwinding like dmDcr2, or to some  
311 other function like terminus discrimination.

312

### 313 **Dicer ATPase function is lost at the onset of vertebrate evolution**

314 As animals evolved from deuterostomes (AncD1<sub>DEUT</sub>) to vertebrates (AncD1<sub>VERT</sub>), Dicer lost the  
315 ability to hydrolyze ATP (Figure 2C, D). The loss of both intrinsic and dsRNA-stimulated ATPase  
316 activity between AncD1<sub>DEUT</sub> and AncD1<sub>VERT</sub> can be attributed to one of a number of evolutionary  
317 events. Whole genome duplication events that occurred at the onset of vertebrate evolution may  
318 have caused subfunctionalization of Dicer's helicase domain, as other antiviral sensors like RIG-  
319 I-like receptors (RLRs) and Toll-like-receptors (TLRS) co-opted the role of sensing pathogen-  
320 associated molecular patterns (PAMPs)<sup>45,61</sup>. Upon binding dsRNAs, these receptors trigger an  
321 enzyme cascade that ultimately produces interferon, a molecule that came into being at the onset  
322 of vertebrate evolution<sup>46</sup>. In support of this model, there are multiple examples of antagonism  
323 between the RNA interference (RNAi) pathway and the RLR signaling pathway in mammals<sup>40,62–</sup>  
324 <sup>64</sup>. The model is further supported by our dsRNA binding studies where the observed weak dsRNA  
325 binding by the vertebrate helicase domain suggests that cytosolic dsRNA recognition was taken  
326 over by RLRs (Figure 3, Table 2). If this model is true, it raises new questions. Is vertebrate Dicer's  
327 loss of ATPase function a consequence of the RLR-interferon axis, a protein-based antiviral  
328 system, taking over antiviral defense from RNAi, a nucleic-acid based defense mechanism?  
329 Could vertebrates maintain both modes of antiviral defense if loss of function in Dicer's helicase  
330 domain was reversed? Further studies on the selection pressures exerted on Dicer in different  
331 species are required to answer these questions.

### 332 **Changes in Dicer helicase domain's conformation influence ATPase activity**

333 The effects of dsRNA binding on ancestral Dicer helicase domains show parallels to previously  
334 reported results for extant Dicers. In the absence of dsRNA, hsDcr and dmDcr2 helicase domains  
335 primarily exist in an "open" conformation, with DUF283 wedged behind the Hel1 subdomain  
336 (Figure 5, A and B)<sup>24,27</sup>. dsRNA binding to dmDcr2's helicase domain causes a conformational  
337 change that brings DUF283 to the cleft of the helicase domain to cap the dsRNA substrate (Figure

338 5C), while Hel2 and Hel2i shift their relative positions to create a “closed” conformation. In the  
339 closed conformation, the distance between the “DECH” box in Hel1 (Motif II) and the arginine  
340 finger motif (Motif VI) in Hel2 is reduced from 13.28Å to 4.26 Å (Figure 5D)<sup>27</sup>. In helicases formed  
341 by two RecA domains, the shorter distance is predicted to be bridged by water, the attacking  
342 nucleophile for cleavage of the gamma-phosphate of the ATP molecule<sup>65,66</sup>. This change in  
343 conformation is consistent with the reduction in the  $K_M$  values for ATP when BLT dsRNA is  
344 included in the ATP hydrolysis reaction for AncD1D2 and AncD1<sub>DEUT</sub> (Figure 4, Table 3). Along  
345 the same lines, a  $K_M$  of 14µM was reported for the dmDcr2 ATPase reaction in the presence of  
346 BLT dsRNA<sup>15</sup>. We predict that excluding dsRNA would also reduce dmDcr2’s affinity for ATP,  
347 explaining why it does not hydrolyze ATP in the absence of dsRNA<sup>30</sup>.

348 AncD1<sub>VERT</sub> structures predicted by AlphaFold2 and RosettaFold have an open conformation, while  
349 AncD1D2 resembles the closed conformation (Figure 5E). All the other ATPase-competent  
350 ancestral HEL-DUFs also have a closed conformation (not shown). While these predictions are  
351 snapshots of a singular conformation from an ensemble of possible conformations, it is intriguing  
352 that the conformational differences between ancestral HEL-DUFs match our experimentally  
353 determined biochemical properties. In AncD1<sub>VERT</sub>, DUF283 (teal) is behind the helicase domain  
354 while AncD1D2’s DUF283 (violet) caps the helicase cleft as in the closed conformation of dmDcr2  
355 (Figure 5E, left panel). Hel2 (green) and Hel2i (teal) subdomains of AncD1<sub>VERT</sub> align closely with  
356 the corresponding subdomains in AncD1D2 (red and violet respectively) (Figure 5E, middle  
357 panel). However, AncD1<sub>VERT</sub>’s Hel1 (green) leans away from the Hel2-Hel2i rigid body by 31.8°  
358 compared to AncD1D2’s Hel1 subdomain (red) (Figure 5E, right panel). This difference in  
359 conformation affects the ATP binding pocket which exists at the interface between Hel1 and Hel2,  
360 showing a wider distance between helicase motif II and motif VI in AncD1<sub>VERT</sub> compared to  
361 AncD1D2 (Figure 5F). This may explain why AncD1<sub>VERT</sub> is incapable of basal hydrolysis even  
362 when catalytic motifs are repaired in AncD1<sub>VERT.1</sub>. Non-catalytic motifs that affect conformation

363 and helicase subdomain movement mediate the loss of ATPase function in vertebrate Dicer's  
364 helicase domain.

### 365 **ATP and dsRNA binding are limiting factors in vertebrate Dicer helicase function**

366 The role of hsDcr in antiviral defense is controversial<sup>10,11,67–70</sup>. The current consensus is that hsDcr  
367 is more relevant for antiviral defense in stem cells, while RLRs and interferon signaling  
368 predominate in somatic cells<sup>40,64</sup>. HsDcr's helicase domain is, however, not involved in stem-cell  
369 specific antiviral function, and in fact, cleavage of viral or endogenous long dsRNA is improved  
370 when the helicase domain is truncated or removed<sup>71,72</sup>. This suggests that hsDcr's helicase  
371 domain is incapable of coupling dsRNA translocation to ATP hydrolysis. Our dsRNA binding data  
372 reinforce this observation: dsRNA binding is significantly worse in AncD1<sub>VERT</sub> than it is for  
373 AncD1D2, suggesting that vertebrates in general do not use Dicer's helicase domain for antiviral  
374 defense (Figure 3). Reinforcing this model, cryo-EM structures of hsDcr report an open  
375 conformation for hsDcr's helicase domain even in the presence of dsRNA (Figure 1C), and  
376 cleavage of long dsRNAs by hsDcr is mediated by direct binding to the platform/PAZ domain with  
377 no requirement for ATP<sup>24,25</sup>.

378 Canonical SF2 helicase ATP binding/hydrolysis motifs, like the eponymous "DECH" box, are  
379 conserved between hsDcr and dmDcr2, but outside these motifs, the primary sequence varies  
380 significantly<sup>28</sup>. Using sequence- and structure-based alignments of our ancestral HEL-DUF  
381 constructs, we identified candidate historical substitutions outside the catalytic motifs (Figure 4-  
382 figure supplement 2) that caused the loss of intrinsic and BLT dsRNA-stimulated ATP hydrolysis  
383 in AncD1<sub>VERT</sub> (Figure 5G). We created AncD1<sub>VERT.7</sub>, a construct with partial rescue of basal and  
384 BLT dsRNA-stimulated ATP hydrolysis with efficiency an order of magnitude lower than  
385 AncD1<sub>DEUT</sub> and AncD1D2. Michaelis-Menten analysis indicated that the limiting factor in our  
386 rescue construct was low affinity for ATP, measured by the  $K_M$  value. This indicates that  
387 AncD1<sub>VERT</sub> does not hydrolyze ATP, despite the conservation of the catalytic "DECH" box,



388 because several motifs distant from the ATPase catalytic site are responsible for loss of ATP  
389 hydrolysis capability. In AncD1<sub>VERT</sub> and hsDcr, these residues likely lock the helicase domain in  
390 the open conformation, preventing the formation of the ATP hydrolysis pocket in the interface  
391 between Hel1 and Hel2 (Figure 4-figure supplement 2, Figure 5). In summary, loss of ATPase  
392 function in vertebrate Dicer and consequently hsDcr, is caused by a set of mutations that restrict  
393 formation of the ATPase pocket as well as dsRNA binding and the conformational changes it  
394 would ordinarily trigger. Further engineering of AncD1<sub>VERT</sub> is required to create a version of  
395 vertebrate Dicer that hydrolyses ATP more efficiently, and couples this hydrolysis to improved  
396 viral siRNA production in the context of the full-length enzyme.

397 In our favorite model for Dicer evolution (Figure 6), the full-length ancestral animal Dicer was  
398 capable of binding dsRNAs at two sites: the platform/PAZ domain for pre-miRNA, and HEL-DUF  
399 for long endogenous or viral dsRNA<sup>1</sup>. This Dicer's helicase domain was probably more  
400 promiscuous for different dsRNA termini and possessed the ability to translocate on dsRNA. After  
401 duplication, arthropod Dicer-2 evolved to a one-site mechanism where the HEL-DUF became the  
402 primary site of dsRNA recognition, as shown in previous work where the platform/PAZ domain in  
403 arthropod Dicer-2 was observed to lose affinity for dsRNA<sup>1</sup>. dsRNA and ATP binding to dmDcr2's  
404 helicase domain drives conformational changes in the entire enzyme and leads to translocation  
405 of dsRNA to the RNaseIII domain for cleavage<sup>27,32</sup>. On the other hand, Dicer-1 underwent a series  
406 of evolutionary changes culminating with vertebrate Dicer's helicase domain losing affinity for both  
407 dsRNA and ATP as RLR helicases co-opted its ancestral antiviral function. Instead, vertebrate  
408 Dicer works with a one-site mechanism where the platform/PAZ domain is the predominant  
409 binding site for all dsRNAs. Further studies exploring how Dicer-1 enzymes from other  
410 invertebrates, like mollusks and echinoderms, process dsRNAs will provide a clearer picture of  
411 how different Dicer domains contribute to different RNAi pathways.

412

413 **Materials and Methods**

414 **Key Resources Table**

| Reagent type or resource                 | Designation                       | Source                           | Identifier     |
|------------------------------------------|-----------------------------------|----------------------------------|----------------|
| Expression plasmid                       | pFastBac-OSF                      | Thermo Fisher, modified in-house |                |
| Suspension cells                         | Spodoptera frugiperda (Sf9) cells | Expression Systems               | Cat# 94-001S   |
| Expression media                         | ESF 921 Insect Cell Media         | Expression Systems               | Cat# 96-001-01 |
| Bacteria cells                           | DH10Bac competent cells           | Thermo Fisher Scientific         | 10361012       |
| Gp64-PE antibody and control baculovirus | Baculovirus Titering Kit          | Expression Systems               | Cat# 97-101    |
| Transfection reagent                     | Cellfectin II                     | Thermo Fisher Scientific         | Cat# 10362100  |

415

416

417 **Phylogenetics and ancestral protein reconstruction**

418 Annotated Dicer protein sequences were retrieved from the NCBI database using taxa from each  
419 of the main animal phyla as queries for the BLAST algorithm<sup>73</sup>. Representative protein sequences  
420 from each metazoan phylum were used as search templates to retrieve a wide range of Dicer  
421 orthologs and paralogs with Fungus Dicers used as the outgroup to root the animal clade. Protein  
422 sequences were clustered using CD-HIT with an identity threshold of 95%, and representative

423 sequences aligned initially with MAFFT<sup>74,75</sup>. Initial multiple sequence alignment (MSA) was used  
424 to assess and visualize Helicase domain and DUF283 boundaries as defined by the Conserved  
425 Domain Database<sup>76</sup>. All downstream analysis was performed on the Helicase and DUF283  
426 referred to as HEL-DUF. Large gaps were manually deleted from the initial HEL-DUF alignment  
427 and PRANK was used to generate a new alignment<sup>77</sup>. Manual curation was carried out to remove  
428 species-specific indels and exclude sequences missing conserved parts of the helicase domain  
429 or DUF283. Model selection was performed on the resulting MSA using ProtTest 3.4.2, producing  
430 JTT+G+F as the best fit evolutionary model using the Akaike Information Criteria (AIC)<sup>78</sup>.

431 RAXML-NG v 1.0.1 was used to infer the maximum likelihood phylogeny using the best fit  
432 evolutionary model, with 8 rate categories in a gamma distribution to model among-site rate  
433 variation<sup>79</sup>. Transfer Bootstrap was used to calculate statistical support for the ancestral nodes  
434 with Fungal Dicers used as the outgroup for rooting the tree. Ancestral state reconstruction in  
435 RAXML-NG using the maximum likelihood tree and the JTT model<sup>79,80</sup>. Because an especially  
436 gappy alignment was produced as a result of using PRANK which models every unique insertion  
437 as a separate evolutionary event<sup>77,81,82</sup>, the input protein MSA was converted to a presence-  
438 absence alignment to model the indels in the alignment, and this matrix was used to perform  
439 ancestral protein reconstruction with the maximum likelihood phylogeny and the BINCAT model  
440 in RAXML-NG<sup>1,83</sup>. Overlapping protein and binary sequence ancestral reconstructions allowed  
441 the identification of spurious indels in ancestral sequences by eliminating low frequency insertions  
442 that were missed during manual curation.

### 443 **Cloning and protein expression**

444 DNA sequences coding for select ancestral protein sequences were codon-optimized for  
445 expression in *Spodoptera frugiperda* (Sf9) insect cells using Integrated DNA Technologies' (IDT)  
446 codon optimization tool. cDNA sequences were synthesized by IDT and subcloned into a modified  
447 pFastBac plasmid containing 2X-Strep Flag tag. Plasmids were transformed into Dh10Bac *E. coli*

448 cells to generate bacmids, which were transfected into Sf9 cells to produce baculovirus vectors  
449 for protein expression<sup>43</sup>. Baculovirus titer was quantified using flow cytometry<sup>84</sup>. Ancestral HEL-  
450 DUF constructs were purified using Strep-Tactin Affinity chromatography, Heparin  
451 chromatography or Ion Exchange chromatography, and Size Exclusion chromatography. All  
452 ancestral constructs eluted as monomers except ANCD1<sub>VERT</sub>, which eluted as a mixture of  
453 monomers and dimers. Purified constructs were identified using mass spectrometry at UC Davis  
454 Proteomics Core Facility.

#### 455 **dsRNA preparation**

456 42 nt single-stranded RNAs were chemically synthesized by University of Utah DNA/RNA  
457 Synthesis Core or IDT. Equimolar amounts of single-stranded RNAs were annealed in annealing  
458 buffer (50 mM TRIS pH 8.0, 20 mM KCl) by placing the reaction on a heat block (95°C) and slow  
459 cooling  $\geq 2$  hours<sup>43</sup>. dsRNAs were gel purified after 8% polyacrylamide native PAGE and  
460 quantified using a Nanodrop.

#### 461 **RNA sequences**

462 42-nt sense RNA:

463 5'-GGGAAGCUCAGAAUUAUUGCACAAGUAGAGCUUCUCGAUCCCC-3'

464 42-nt antisense BLUNT RNA:

465 5'-GGGGAUCGAGAAGCUCUACUUGUGCAAUAUUCUGAGCUUCCC-3'

466 42-nt antisense 3'OVR RNA:

467 5'-GGAUCGAGAAGCUCUACUUGUGCAAUAUUCUGAGCUUCCCGG-3'

468

## 469 **ATP hydrolysis assays**

470 Reactions were performed at 37°C in 65µL reaction mixtures containing cleavage assay buffer  
471 (25mM TRIS pH 8.0, 100mM KCl, 10mM MgCl<sub>2</sub>, 1mM TCEP) for the times indicated, with 200nM  
472 ancestral protein and 400nM 42 BLT or 3'ovr dsRNA, in the presence of 100µM ATP-MgOAc with  
473 [ $\alpha$ -<sup>32</sup>P] ATP (3000 Ci/mmol, 100nM) spiked in to monitor hydrolysis. Protein was preincubated at  
474 37°C for 3 min prior to the addition to reaction mix. Reactions were started by the addition of  
475 protein to reaction mix containing ATP and dsRNA. 2µL of reaction were removed at indicated  
476 times, quenched by addition of 2µL of 500mM EDTA, spotted (3µL) onto 20 x 20 cm PEI-cellulose  
477 plates (Cel 300 PEI/UV 254 TLC Plates 20x20, Machery-Nagel, Ref 801063), and  
478 chromatographed with 0.75M KH<sub>2</sub>PO<sub>4</sub> (adjusted to pH 3.3 with H<sub>3</sub>PO<sub>4</sub>) until solvent front reached  
479 the top of the plate. Plates were dried, visualized on a PhosphorImager screen (Molecular  
480 Dynamics) and quantified using ImageQuant software.

481 Quantification of ATP hydrolysis assays for Table 1 was done by fitting the data into a two-phase  
482 exponent, with the first phase modelled as a linear reaction between time 0 and 2.5 minutes. The  
483 first phase is considered to be a transient zero order reaction where the rate constant  $k$  is equal  
484 to the velocity of the reaction, which is the slope of ADP produced/ATP consumed ( $y$ ) per minute  
485 ( $t$ ). In reality, this rapid first phase probably ended before 2.5 minutes but we are limited by the  
486 nature of manually mixed assays, as opposed to stopped flow assays where mixing and signal  
487 collection can be done on the timescale of seconds.

$$488 \quad y = kt + \text{intercept}$$

489 Data for the second phase were fit to the pseudo-first order equation  $y = y_0 + A \times (1 - e^{-kt})$ ; where  $y$   
490 = product formed (ADP in µM);  $A$  = amplitude of the rate curve,  $y_0$  = baseline,  $k$  = pseudo-first-  
491 order rate constant =  $k_{\text{obs}}$ ;  $t$  = time. Data points are mean  $\pm$  SD ( $n \geq 3$ ).

492 For the Michaelis-Menten ATP hydrolysis assays, varying amounts of ATP-MgOAc with [ $\alpha$ -<sup>32</sup>P]  
493 ATP (3000 Ci/mmol, 50nM) was incubated with the indicated protein concentrations and the  
494 velocity of the steady-state reaction was calculated using a linear regression:

495  $\text{ADP produced } (\mu\text{M}) = \text{velocity } (\mu\text{M}/\text{min}) \times \text{time } (\text{min})$

496 The velocity recorded for each starting ATP concentration was fit into the Michaelis-Menten  
497 equation:

498  $\text{Velocity} = V_{\text{max}} * X / (K_M + X)$ , where  $V_{\text{max}}$  is the maximum enzyme velocity ( $\mu\text{M}/\text{min}$ ),  $X$  is the ATP  
499 concentration (mM) and  $K_M$  is the Michaelis-Menten constant.

500 The turnover number,  $k_{\text{cat}}$ , was calculated by dividing  $V_{\text{max}}$  by the total enzyme concentration.

501 GraphPad Prism version 9 was used for curve-fitting analysis.

## 502 **Gel shift mobility assays**

503 Gel mobility shift assays were performed with 20pM 42-basepair BLT or 3'ovr dsRNA, with sense  
504 strand labeled with <sup>32</sup>P at the 5' terminus. Labeled dsRNA was incubated and allowed to reach  
505 equilibrium (30 min, 4°C) with HEL-DUF construct in the presence and absence of 5mM ATP-  
506 MgOAc<sub>2</sub>, in binding buffer (25 mM TRIS pH 8.0, 100 mM KCl, 10 mM MgCl<sub>2</sub>, 10% (vol/vol) glycerol,  
507 1 mM TCEP); final reaction volume, 20  $\mu\text{L}$ . Ancestral HEL-DUF protein was serially diluted in  
508 binding buffer before addition to binding reaction. Reactions were stopped by loading directly onto  
509 a 5% polyacrylamide (19:1 acrylamide/bisacrylamide) native gel running at 200V at 4°C, in 0.5X  
510 Tris/Borate/EDTA running buffer. The gel was pre-run (30 min) before loading samples. Gels were  
511 electrophoresed (2 hr) to resolve HEL-DUF-bound dsRNA from free dsRNA, dried (80°C, 1 hr)  
512 and exposed overnight to a Molecular Dynamics Storage Phosphor Screen. Radioactivity signal  
513 was visualized on a Typhoon PhosphorImager (GE Healthcare LifeSciences) in the linear  
514 dynamic range of the instrument and quantified using ImageQuant version 8 software.

515 Radioactivity in gels corresponding to dsRNA<sub>total</sub> and dsRNA<sub>free</sub> was quantified to determine the  
516 fraction bound. Fraction bound =  $1 - (\text{dsRNA}_{\text{free}}/\text{dsRNA}_{\text{total}})$ . All dsRNA that migrated through the  
517 gel more slowly than dsRNA<sub>free</sub> was considered as bound. To determine K<sub>d</sub> values, binding  
518 isotherms were fit using the Hill formalism, where fraction bound =  $1/(1 + (K_d^n/[P]^n))$ ; K<sub>d</sub> =  
519 equilibrium dissociation constant, n = Hill coefficient, [P] = protein concentration<sup>85</sup>. GraphPad  
520 Prism version 9 was used for curve-fitting analysis.

## 521 **Figure Legends**

522 **Figure 1. Phylogenetic analysis of Helicase domains and DUF283 of metazoan Dicer**  
523 **proteins. A.** Domain organization of *Drosophila melanogaster* Dicer-2 and *Homo sapiens* Dicer,  
524 with colored rectangles showing conserved domain boundaries indicated by amino acid number.  
525 Domain boundaries were defined by information from NCBI Conserved Domains Database  
526 (CDD), available crystal and cryo-EM structures, and structure-based alignments from previous  
527 studies<sup>24,28,76</sup>. **B.** Structure of dmDcr2 bound to dsRNA (yellow) at the helicase domain. Left: front  
528 view. Right: bottom-up view. (PDB: 7W0C). **C.** Structure of hsDcr bound to dsRNA (yellow) at the  
529 platform/ PAZ domain. Left: front view. Right: bottom-up view. (PDB: 5ZAL). **D.** Summarized  
530 maximum likelihood phylogenetic tree constructed from metazoan Dicer helicase domains and  
531 DUF283. Nodes of interest are indicated with black rounded rhombi. ARTH: Arthropod, LOPH:  
532 Lophotrochozoa, DEUT: Deuterostome, VERT: Vertebrate.

533 **Figure 1-figure supplement 1. Maximum likelihood phylogenetic tree constructed from**  
534 **metazoan Dicer helicase domain and DUF283.** Dicer HEL-DUF phylogenetic tree visualized  
535 and annotated with FigTree. Resurrected ancestral nodes are indicated by black circles, with  
536 transfer bootstrap values indicated. Width of cartoon triangle base represents number of species.  
537 Scale bar represents total amino acid substitutions divided by number of amino acid sites i.e.,  
538 amino acid substitutions per site.

539

540 **Figure 1-figure supplement 2. Alternative reconstructions of phylogenetic tree depicting**

541 **Dicer HEL-DUF evolution. A.** Summarized phylogenetic tree showing species-accurate  
542 relationships among metazoan phyla. Gene duplication occurs early in animal evolution. **B.**  
543 Summarized phylogenetic tree showing species-accurate relationships among metazoan phyla.  
544 Gene duplication is constrained to being arthropod-specific.

545 **Figure 1-figure supplement 3. Constraining the phylogenetic tree to species-accurate**  
546 **relationships does not significantly impact ancestral protein reconstruction. A.** Multiple

547 sequence alignment illustrated with ESPript, depicting amino acid sequences for reconstructed  
548 AncD1<sub>DEUT</sub> node using either the gene tree or the species tree<sup>86</sup>. Red, identity; yellow, similarity;  
549 unshaded, no similarity. Secondary structures for AncD1<sub>DEUT</sub> determined with RosettaFold are  
550 shown above aligned sequences. TT represents beta turns. **B.** Multiple sequence alignment  
551 illustrated with ESPript, depicting amino acid sequences for the reconstructed AncD1D2 node  
552 using either the gene tree or the species tree<sup>86</sup>. Red, identity; yellow, similarity; unshaded, no  
553 similarity. Secondary structures for AncD1D2 determined with RosettaFold are shown above  
554 aligned sequences. TT represents beta turns

555 **Figure 1-figure supplement 4. Reconstructed HEL-DUF constructs are predicted with high**  
556 **confidence and expressed recombinantly. A.** Reconstructed HEL-DUFs at nodes of interest

557 are predicted with posterior probabilities for each amino acid. Posterior probabilities for each  
558 amino acid are plotted and binned by 0.1. AncD1<sub>VERT</sub> is predicted with the highest confidence. **B.**  
559 Coomassie-stained SDS-PAGE showing recombinantly expressed and purified full length  
560 *Drosophila melanogaster* Dicer-2 and ancestral HEL-DUFs.

561



562 **Figure 2. ATP hydrolysis capability is present in ancestral metazoan Dicer but lost at the**  
563 **common ancestor of vertebrates. A-D.** PhosphorImages of representative Thin-layer  
564 Chromatography (TLC) plates showing hydrolysis of 100 $\mu$ M ATP (spiked with  $\alpha$ -<sup>32</sup>P-ATP) by  
565 200nM ancestral HEL-DUFs for various times as indicated, at 37°C, in absence of dsRNA or in  
566 the presence of 400nM 42 base-pair dsRNA with BLT or 3'ovr termini (see cartoons; not  
567 radiolabeled). **E.** Graph shows quantification of ATP hydrolysis assays (A-D) performed with  
568 select ancestral HEL-DUF enzymes in the absence of dsRNA. Data for “NO RNA” reactions were  
569 fit to the pseudo-first order equation  $y = y_o + A \times (1 - e^{-kt})$ ; where  $y$  = product formed (ADP in  $\mu$ M);  
570  $A$  = amplitude of the rate curve,  $y_o$  = baseline ( $\sim 0$ ),  $k$  = pseudo-first-order rate constant =  $k_{obs}$ ;  $t$  =  
571 time. Data points are mean  $\pm$  SD ( $n \geq 3$ ). **F.** Graph shows quantification of ATP hydrolysis assays  
572 (A-D) performed with select ancestral HEL-DUF enzymes in the presence of dsRNA. Reactions  
573 with RNA were fit in two phases, first a linear phase for data below the first timepoint at 2.5  
574 minutes, then a pseudo-first order exponential equation for remaining data. Equation,  $y = y_o + A$   
575  $\times (1 - e^{-kt})$ ; where  $y$  = product formed (ADP in  $\mu$ M);  $A$  = amplitude of the rate curve,  $y_o$  = baseline  
576 ( $\sim 0$ ),  $k$  = pseudo-first-order rate constant =  $k_{obs}$ ;  $t$  = time. Data points are mean  $\pm$  SD ( $n \geq 3$ ).

577 **Figure 3. Binding affinity of ancestral HEL-DUF proteins to BLT and 3'ovr dsRNA in the**  
578 **presence and absence of ATP. A.** Cartoon of dsRNAs used in (B-G) showing position of 5' <sup>32</sup>P  
579 (\*) on top, sense strand. **B-G.** Representative PhosphorImages showing gel mobility shift assays  
580 using select ancestral HEL-DUF constructs, as indicated, and 42-basepair BLT or 3'ovr dsRNA  
581 in the absence (-) or presence of 5mM ATP at 4°C. **H.** Radioactivity in PhosphorImages as in A-  
582 G was quantified to generate binding isotherms for ancestral HEL-DUF proteins. Fraction bound  
583 was determined using radioactivity for dsRNA<sub>free</sub> and dsRNA<sub>bound</sub>. Data were fit to calculate  
584 dissociation constant,  $K_d$ , using the Hill formalism, where fraction bound =  $1/(1 + (K_d^n/[P]^n))$ . Data  
585 points, mean  $\pm$  SD ( $n \geq 3$ ).

586 **Figure 4. BLT dsRNA improves efficiency of ATP hydrolysis by improving affinity of ATP**  
587 **to ancient HEL-DUF enzymes. A.** Michaelis-Menten plots for basal and dsRNA-stimulated ATP  
588 hydrolysis by AncD1D2. Basal ATP hydrolysis measured at 500nM AncD1D2, while dsRNA-  
589 stimulated hydrolysis is measured at 100nM. Velocities for dsRNA-stimulated reaction have been  
590 multiplied by 5 to normalize this concentration difference. Right: inset showing Michaelis-Menten  
591 plot at low ATP concentrations. Hydrolysis data for individual ATP concentrations is included in  
592 Figure 4-figure supplement 1. **B.** Michaelis-Menten plots for basal and dsRNA-stimulated ATP  
593 hydrolysis by 500nM AncD1<sub>DEUT</sub>. Right: inset showing Michaelis-Menten plot at low ATP  
594 concentrations. Hydrolysis data for individual ATP concentrations is included in Figure 4-figure  
595 supplement 1. **C.** Michaelis-Menten plots for basal and dsRNA-stimulated ATP hydrolysis by 5 $\mu$ M  
596 AncD1<sub>VERT.7</sub>. Right: inset showing Michaelis-Menten plot at low ATP concentrations. Hydrolysis  
597 data for individual ATP concentrations is included in Figure 4-figure supplement 1. Data points,  
598 mean  $\pm$  SD (n $\geq$ 3).

599 **Figure 4-figure supplement 1. Plots of ADP production over time for ancestral HEL-DUF**  
600 **constructs. A.** Basal ATP hydrolysis by 500nM AncD1D2, measured by linear ADP production  
601 over time for indicated ATP concentrations. Velocity of each reaction is the slope of the line. **B.**  
602 dsRNA-stimulated ATP hydrolysis by 100nM AncD1D2 and 400nM BLT dsRNA, measured by  
603 linear ADP production over time for indicated ATP concentrations. Velocity of each reaction is the  
604 slope of the line. **C.** Basal ATP hydrolysis by 500nM AncD1<sub>DEUT</sub>, measured by linear ADP  
605 production over time for indicated ATP concentrations. Velocity of each reaction is the slope of  
606 the line. **D.** dsRNA-stimulated ATP hydrolysis by 500nM AncD1<sub>DEUT</sub> and 10 $\mu$ M BLT dsRNA,  
607 measured by linear ADP production over time for indicated ATP concentrations. Velocity of each  
608 reaction is the slope of the line. **E.** Basal ATP hydrolysis by 5 $\mu$ M AncD1<sub>VERT.7</sub>, measured by linear  
609 ADP production over time for indicated ATP concentrations. Velocity of each reaction is the slope  
610 of the line. **F.** dsRNA-stimulated ATP hydrolysis by 5 $\mu$ M AncD1<sub>VERT.7</sub> and 120 $\mu$ M BLT dsRNA,

611 measured by linear ADP production over time for indicated ATP concentrations. Velocity of each  
612 reaction is the slope of the line. Data points, mean  $\pm$  SD (n $\geq$ 3).

613 **Figure 4-figure supplement 2. Multiple sequence alignment of ancestral HEL-DUF**  
614 **constructs and AncD1<sub>VERT</sub> rescue constructs.** Multiple sequence alignment for ancestral HEL-  
615 DUF constructs and vertebrate HEL-DUF rescue constructs, carried out with PRANK, and  
616 illustrated with ESPript. Red shading/white text indicates identity, no shading/red text indicates  
617 similarity, black text indicates no conservation. Columns with black and red text have at least 70%  
618 conservation, represented by red text, while black text indicates the non-conserved or variant  
619 amino acids. Amino acid substitutions in both rescue constructs are indicated by red circles below  
620 the column, while amino acid changes specific to AncD1<sub>VERT-7</sub> are indicated by blue triangles.  
621 Residues numbered using shortest ancestral HEL-DUF amino acid sequence. Motif Q is  
622 numbered 9-16, motif I numbered 31-38, motif II numbered 142-145, motif III numbered 175-177,  
623 motif VI numbered 476-482.

624 **Figure 4-figure supplement 3. ATP hydrolysis of ancestral HEL-DUF proteins**  
625 **reconstructed from incongruent nodes. A-B.** PhosphorImages of representative TLC plates  
626 showing hydrolysis of 100 $\mu$ M ATP (spiked with  $\alpha$ -<sup>32</sup>P-ATP) by 200nM AncD1<sub>ARTH/LOPH/DEUT</sub> (A) or  
627 AncD1<sub>LOPH/DEUT</sub> (B) in absence of dsRNA (left) or in the presence of 400nM 42 base-pair dsRNA  
628 with BLT or 3' 2-nucleotide overhang (right). **C-D.** Graph shows quantification of ATP hydrolysis  
629 assays in (A-B) performed with select ancestral HEL-DUF enzymes in the absence (C) or  
630 presence (D) of dsRNA. Data for "NO RNA" reactions were fit to the pseudo-first order equation  
631  $y = y_0 + A \times (1 - e^{-kt})$ ; where  $y$  = product formed (ADP in  $\mu$ M);  $A$  = amplitude of the rate curve,  $y_0$  =  
632 baseline ( $\sim$ 0),  $k$  = pseudo-first-order rate constant =  $k_{obs}$ ;  $t$  = time. Reactions with RNA were fit in  
633 two phases, first a linear phase for data below the first timepoint at 2.5 minutes, then a pseudo-  
634 first order exponential equation for remaining data. Data points are mean  $\pm$  SD (n $\geq$ 3).

635 **Figure 4-figure supplement 4. Affinity of AncD1<sub>ARTH/LOPH/DEUT</sub> and AncD1<sub>LOPH/DEUT</sub> for binding**  
636 **BLT and 3'ovr dsRNA in the absence and presence of ATP. A-D.** Representative  
637 PhosphorImages showing gel mobility shift assays using select ancestral HEL-DUF constructs as  
638 indicated, and 42 base-pair BLT or 3'ovr dsRNA in the absence or presence of 5mM ATP. **E.**  
639 Radioactivity in PhosphorImages as in A-D was quantified to generate binding isotherms for  
640 ancestral HEL-DUF proteins. Fraction bound was determined using radioactivity for dsRNA<sub>free</sub> and  
641 dsRNA<sub>bound</sub>. Data were fit to calculate dissociation constant,  $K_d$ , using the Hill formalism, where  
642 fraction bound =  $1/(1 + (K_d^n/[P]^n))$ . Data points, mean  $\pm$  SD (n $\geq$ 3).

643 **Figure 5. dsRNA binding triggers conformational changes in the HEL-DUF domains of**  
644 **Dicer. A.** Bottom-up view of the structure of hsDcr Dicer in the apo state (PDB: 5ZAK). Helicase  
645 subdomains and DUF283 are colored. Rest of enzyme is transparent. **B.** Bottom-up view of the  
646 structure of dmDcr2 in the apo state (PDB: 7W0B). Helicase subdomains and DUF283 are colored  
647 for visibility. Rest of enzyme is transparent. **C.** Structure of dmDcr2 bound to dsRNA in the “early  
648 translocation” state (PDB: 7W0C). Helicase subdomains and DUF283 are colored for visibility.  
649 **D.** Details of interactions at the ATP binding pocket of dmDcr2, comparing the distance between  
650 Motif II and Motif VI for the apo enzyme and the enzyme in the presence of ATP and dsRNA.  
651 Green sphere is magnesium ion, a cofactor in Sf2 helicase ATP hydrolysis. **E.** Structural  
652 alignment of predicted structures for AncD1D2 and AncD1<sub>VERT</sub> HEL-DUFs showing  
653 conformational differences in position of Hel1 and pincer subdomains and DUF283. Pincer and  
654 DUF293, left panel; Hel2 and Hel2i, middle panel; Hel1, right panel. Green and teal coloring  
655 represent AncD1<sub>VERT</sub> subdomains, red and violet coloring represent AncD1D2 subdomains.  
656 Deuterostome-specific insert refers to a Hel2 insertion present in AncD1<sub>DEUT</sub> and AncD1<sub>VERT</sub>.  
657 Structural predictions were performed with RosettaFold and AlphaFold2. pLDDT score: 81.76 for  
658 AncD1D2, 74.60 for AncD1<sub>VERT</sub>. **F.** Details of the interactions of the ATP binding pocket for  
659 AncD1D2 and AncD1<sub>VERT</sub>, showing a wider cleft between Motif II and Motif VI for AncD1<sub>VERT</sub>

660 (violet) compared to AncD1D2 (green). **G.** RosettaFold predicted structures for AncD1<sub>VERT</sub>  
661 (transparent) showing sites of amino acid substitutions for both AncD1<sub>VERT.1</sub> and AncD1<sub>VERT.7</sub>  
662 marked in red, and amino acid substitutions unique to AncD1<sub>VERT.7</sub> marked in blue. ATP hydrolysis  
663 pocket is depicted.

664 **Figure 6. Model of metazoan Dicer evolution showing transition from a 2-site dsRNA**  
665 **binding in ancestral Dicer to a 1-site dsRNA binding state in extant vertebrate and**  
666 **arthropod Dicers.** Early animals possessed one promiscuous Dicer enzyme capable of using  
667 both platform/PAZ and helicase domains for dsRNA recognition. After gene duplication, arthropod  
668 Dicer-2's helicase domain becomes specialized for viral and endogenous long dsRNA processing  
669 and becomes the primary site of dsRNA binding. Deuterostome Dicer-1 may have retained 2-site  
670 dsRNA recognition, but at the onset of vertebrate evolution, Dicer-1 loses helicase function and  
671 exclusively uses the platform/PAZ domain to recognize dsRNA.

672 **Figure 1-figure supplement 4 – Source Data 1:** Original digital image of SDS-PAGE gel used  
673 in B.

674 **Figure 2 – Source Data 1:** Raw digital images of Thin Layer Chromatography plate used in 2A.

675 **Figure 2 – Source Data 2:** Raw digital image of Thin Layer Chromatography plate used in 2A.

676 **Figure 2 – Source Data 3:** Raw digital image of Thin Layer Chromatography plate used in 2B.

677 **Figure 2 – Source Data 4:** Raw digital image of Thin Layer Chromatography plate used in 2B.

678 **Figure 2 – Source Data 5:** Raw digital image of Thin Layer Chromatography plate used in 2C.

679 **Figure 2 – Source Data 6:** Raw digital image of Thin Layer Chromatography plate used in 2C.

680 **Figure 2 – Source Data 7:** Raw digital image of Thin Layer Chromatography plate used in 2D.

681 **Figure 2 – Source Data 8:** Raw digital image of Thin Layer Chromatography plate used in 2D.

682 **Figure 3 – Source Data 1:** Raw digital image of Gel Shift phosphoimager plate used in 3B.

683 **Figure 3 – Source Data 2:** Raw digital image of Gel Shift phosphoimager plate used in 3C.

684 **Figure 3 – Source Data 3:** Raw digital image of Gel Shift phosphoimager plate used in 3C.

685 **Figure 3 – Source Data 4:** Raw digital image of Gel Shift phosphoimager plate used in 3D.

686 **Figure 3 – Source Data 5:** Raw digital image of Gel Shift phosphoimager plate used in 3E.

687 **Figure 3 – Source Data 6:** Raw digital image of Gel Shift phosphoimager plate used in 3F.

688 **Figure 3 – Source Data 7:** Raw digital image of Gel Shift phosphoimager plate used in 3G.

689 **Figure 4-figure supplement 3 – Source Data 1:** Raw digital image of Thin Layer  
690 Chromatography plate used in Figure 4-figure supplement 3A, left panel.

691 **Figure 4-figure supplement 3 – Source Data 2:** Raw digital image of Thin Layer  
692 Chromatography plate used in Figure 4-figure supplement 3A, right panel.

693 **Figure 4-figure supplement 3 – Source Data 3:** Raw digital image of Thin Layer  
694 Chromatography plate used in Figure 4-figure supplement 3B.

695 **Figure 4-figure supplement 3 – Source Data 4:** Raw digital image of Thin Layer  
696 Chromatography plate used in Figure 4-figure supplement 3B.

697 **Figure 4-figure supplement 4 – Source Data 1:** Raw digital image of Gel Shift phosphoimager  
698 plate used in Figure 4-figure supplement 4A.

699 **Figure 4-figure supplement 4 – Source Data 2:** Raw digital image of Gel Shift phosphoimager  
700 plate used in Figure 4-figure supplement 4B.

701 **Figure 4-figure supplement 4 – Source Data 3:** Raw digital image of Gel Shift phosphoimager  
702 plate used in Figure 4-figure supplement 4C.

703 **Figure 4-figure supplement 4 – Source Data 4:** Raw digital image of Gel Shift phosphoimager  
 704 plate used in Figure 4-figure supplement 4D.

705

**Table 1: Summary of kinetic data for ATP hydrolysis with 100 $\mu$ M ATP.**

| Construct                       | $k_{burst}$ ( $\mu$ M/min), NO RNA<br>$k_{obs}$ ( $min^{-1}$ ) | $k_{burst}$ ( $\mu$ M/min), BLT dsRNA<br>$k_{obs}$ ( $min^{-1}$ ) | $k_{burst}$ ( $\mu$ M/min), 3'ovr dsRNA<br>$k_{obs}$ ( $min^{-1}$ ) |
|---------------------------------|----------------------------------------------------------------|-------------------------------------------------------------------|---------------------------------------------------------------------|
| AncD1D2                         | -<br>$0.06 \pm 0.01$                                           | $14.3 \pm 1.7$<br>$0.11 \pm 0.03$                                 | $13.9 \pm 0.5$<br>$0.11 \pm 0.02$                                   |
| AncD2 <sub>ARTH</sub>           | $6.47 \pm 0.8$<br>$0.05 \pm 0.01$                              | $19.3 \pm 0.9$<br>$0.04 \pm 0.02$                                 | $14.6 \pm 2.3$<br>$0.08 \pm 0.02$                                   |
| AncD1 <sub>ARTH/LOPH/DEUT</sub> | -<br>$0.01 \pm 0.01$                                           | $25.1 \pm 0.7$<br>$0.41 \pm 0.02$                                 | $16.0 \pm 3.8$<br>$0.21 \pm 0.04$                                   |
| AncD1 <sub>LOPH/DEUT</sub>      | -<br>$0.07 \pm 0.02$                                           | $7.4 \pm 0.3$<br>$0.04 \pm 0.01$                                  | $3.8 \pm 0.6$<br>$0.03 \pm 0.01$                                    |
| AncD1 <sub>DEUT</sub>           | -<br>$0.09 \pm 0.02$                                           | $6.0 \pm 0.7$<br>$0.06 \pm 0.03$                                  | $1.4 \pm 0.03$<br>$0.06 \pm 0.02$                                   |
| AncD1 <sub>VERT</sub>           | -                                                              | -                                                                 | -                                                                   |

706

707

708

709

**Table 2: Dissociation constants for dsRNA binding to ancestral HEL-DUFs.**

| Construct                       | $K_d$ (nM) BLT, NO ATP<br>Hill coefficient | $K_d$ (nM) 3'ovr, NO ATP<br>Hill coefficient | $K_d$ (nM) BLT, 5mM ATP<br>Hill coefficient | $K_d$ (nM) 3'ovr, 5mM ATP<br>Hill coefficient |
|---------------------------------|--------------------------------------------|----------------------------------------------|---------------------------------------------|-----------------------------------------------|
| AncD1D2                         | $3.4 \pm 0.4$<br>$1.6 \pm 0.2$             | $6.5 \pm 0.8$<br>$1.4 \pm 0.2$               | $6.4 \pm 0.7$<br>$1.4 \pm 0.2$              | $15.9 \pm 2.4$<br>$1.3 \pm 0.2$               |
| AncD2 <sub>ARTH</sub>           | n.d.                                       | n.d.                                         | n.d.                                        | n.d.                                          |
| AncD1 <sub>ARTH/LOPH/DEUT</sub> | $23.8 \pm 2.2$<br>$2.0 \pm 0.4$            | $40.1 \pm 3.7$<br>$1.7 \pm 0.3$              | $17.5 \pm 2.1$<br>$1.6 \pm 0.3$             | $17.3 \pm 1.5$<br>$1.7 \pm 0.2$               |
| AncD1 <sub>LOPH/DEUT</sub>      | $60.9 \pm 5.9$<br>$1.9 \pm 0.3$            | $90.8 \pm 8.8$<br>$1.4 \pm 0.2$              | $38.0 \pm 3.5$<br>$2.3 \pm 0.5$             | $49.0 \pm 5.2$<br>$1.4 \pm 0.2$               |
| AncD1 <sub>DEUT</sub>           | $145.1 \pm 9.1$<br>$2.3 \pm 0.3$           | $140.0 \pm 8.9$<br>$2.3 \pm 0.3$             | $131.8 \pm 8.7$<br>$2.2 \pm 0.3$            | $149.8 \pm 8.3$<br>$2.4 \pm 0.3$              |
| AncD1 <sub>VERT</sub>           | $502.4 \pm 40.5$<br>$2.6 \pm 0.5$          | $537.8 \pm 47.5$<br>$2.8 \pm 0.6$            | $592 \pm 48.6$<br>$2.2 \pm 0.4$             | $500.3 \pm 58.0$<br>$1.9 \pm 0.4$             |

710

711

712

| Construct                           | $k_{cat}$ ( $\text{min}^{-1}$ ) | $K_M$ ( $\mu\text{M}$ ) | $k_{cat}/K_M$ ( $\mu\text{M}^{-1} \text{min}^{-1}$ ) |
|-------------------------------------|---------------------------------|-------------------------|------------------------------------------------------|
| AncD1D2, no dsRNA                   | $1117 \pm 94.5$                 | $35812 \pm 6367$        | 0.031                                                |
| AncD1D2, BLT dsRNA                  | $147.8 \pm 6.3$                 | $256 \pm 67.5$          | 0.577                                                |
| AncD1 <sub>DEUT</sub> , no dsRNA    | $144.1 \pm 14.9$                | $2550 \pm 855$          | 0.055                                                |
| AncD1 <sub>DEUT</sub> , BLT dsRNA   | $40.31 \pm 3.78$                | $336.4 \pm 142$         | 0.12                                                 |
| AncD1 <sub>VERT</sub> , no dsRNA    | -                               | -                       | -                                                    |
| AncD1 <sub>VERT.7</sub> , no dsRNA  | $257.7 \pm 28.7$                | $61739 \pm 12886$       | 0.004                                                |
| AncD1 <sub>VERT.7</sub> , BLT dsRNA | $24.87 \pm 3.52$                | $5173 \pm 1929$         | 0.005                                                |

713

714

715

## 716 **Acknowledgments**

717 We thank Alesia McKeown, Nels Elde, Paul Sigala, Peter Shen, Demian Cazalla, Tyler  
718 Starr and Thomas Koch, as well as members of the Bass Lab for helpful discussions and  
719 feedback. We thank Claudia Consalvo for help with assay design and assistance with flow  
720 cytometry. We thank James Marvin for supervision of flow cytometry procedure, and Ryan  
721 Andrews for help with figure design, and Michelle Salemi (UC Davis Proteomics Core) for  
722 assistance with protein mass spectrometry. AA was supported by the 3i Initiative Graduate  
723 Fellowship at the University of Utah. DNA synthesis and flow cytometry was performed at  
724 the University of Utah Core Facilities. This work was supported by funding to BLB from  
725 the National Institute of General Medical Sciences (R35GM141262) and the National  
726 Cancer Institute of the National Institutes of Health (R01CA260414).

727

728



729 **References**

- 730 1. Jia, H., Kolaczowski, O., Rolland, J. & Kolaczowski, B. Increased Affinity for RNA Targets Evolved Early  
731 in Animal and Plant Dicer Lineages through Different Structural Mechanisms. *Mol Biol Evol* 34, 3047–  
732 3063 (2017).
- 733 2. Gao, Z., Wang, M., Blair, D., Zheng, Y. & Dou, Y. Phylogenetic Analysis of the Endoribonuclease Dicer  
734 Family. *Plos One* 9, e95350 (2014).
- 735 3. Fukudome, A. & Fukuhara, T. Plant dicer-like proteins: double-stranded RNA-cleaving enzymes for  
736 small RNA biogenesis. *J Plant Res* 130, 33–44 (2017).
- 737 4. Kidwell, M. A., Chan, J. M. & Doudna, J. A. Evolutionarily Conserved Roles of the Dicer Helicase  
738 Domain in Regulating RNA Interference Processing\*. *J Biol Chem* 289, 28352–28362 (2014).
- 739 5. Tabara, M., Koiwa, H., Suzuki, N. & Fukuhara, T. Biochemical characterization of the dicing activity of  
740 Dicer-like 2 in the model filamentous fungus *Neurospora crassa*. *Fungal Genet Biol* 146, 103488 (2021).
- 741 6. Bernstein, E., Caudy, A. A., Hammond, S. M. & Hannon, G. J. Role for a bidentate ribonuclease in the  
742 initiation step of RNA interference. *Nature* 409, 363–366 (2001).
- 743 7. Kim, V. N., Han, J. & Siomi, M. C. Biogenesis of small RNAs in animals. *Nat Rev Mol Cell Bio* 10, 126–  
744 139 (2009).
- 745 8. Ha, M. & Kim, V. N. Regulation of microRNA biogenesis. *Nat Rev Mol Cell Bio* 15, 509–524 (2014).
- 746 9. Watanabe, T. *et al.* Endogenous siRNAs from naturally formed dsRNAs regulate transcripts in mouse  
747 oocytes. *Nature* 453, 539–543 (2008).
- 748 10. Li, Y. *et al.* Induction and suppression of antiviral RNA interference by influenza A virus in  
749 mammalian cells. *Nat Microbiol* 2, 16250 (2016).
- 750 11. Qiu, Y. *et al.* Human Virus-Derived Small RNAs Can Confer Antiviral Immunity in Mammals. *Immunity*  
751 46, 992-1004.e5 (2017).
- 752 12. Ashe, A. *et al.* A deletion polymorphism in the *Caenorhabditis elegans* RIG-I homolog disables viral  
753 RNA dicing and antiviral immunity. *Elife* 2, e00994 (2013).
- 754 13. Welker, N. C. *et al.* Dicer's helicase domain is required for accumulation of some, but not all, *C.*  
755 *elegans* endogenous siRNAs. *Rna* 16, 893–903 (2010).
- 756 14. Lee, Y. S. *et al.* Distinct Roles for *Drosophila* Dicer-1 and Dicer-2 in the siRNA/miRNA Silencing  
757 Pathways. *Cell* 117, 69–81 (2004).
- 758 15. Cenik, E. S. *et al.* Phosphate and R2D2 Restrict the Substrate Specificity of Dicer-2, an ATP-Driven  
759 Ribonuclease. *Mol Cell* 42, 172–184 (2011).

- 760 16. Wang, Q. *et al.* Mechanism of siRNA production by a plant Dicer-RNA complex in dicing-competent  
761 conformation. *Science* 374, 1152–1157 (2021).
- 762 17. Wei, X. *et al.* Structural basis of microRNA processing by Dicer-like 1. *Nat Plants* 7, 1389–1396  
763 (2021).
- 764 18. Deleris, A. *et al.* Hierarchical Action and Inhibition of Plant Dicer-Like Proteins in Antiviral Defense.  
765 *Science* 313, 68–71 (2006).
- 766 19. Loffer, A. *et al.* A DCL3 dicing code within Pol IV-RDR2 transcripts diversifies the siRNA pool guiding  
767 RNA-directed DNA methylation. *Elife* 11, e73260 (2022).
- 768 20. Poirier, E. Z. *et al.* Dicer-2-Dependent Generation of Viral DNA from Defective Genomes of RNA  
769 Viruses Modulates Antiviral Immunity in Insects. *Cell Host Microbe* 23, 353-365.e8 (2018).
- 770 21. Deddouche, S. *et al.* The DExD/H-box helicase Dicer-2 mediates the induction of antiviral activity in  
771 drosophila. *Nat Immunol* 9, 1425–1432 (2008).
- 772 22. Tsutsumi, A., Kawamata, T., Izumi, N., Seitz, H. & Tomari, Y. Recognition of the pre-miRNA structure  
773 by Drosophila Dicer-1. *Nat Struct Mol Biol* 18, 1153–1158 (2011).
- 774 23. Wu, H. *et al.* Plant 22-nt siRNAs mediate translational repression and stress adaptation. *Nature* 581,  
775 89–93 (2020).
- 776 24. Liu, Z. *et al.* Cryo-EM Structure of Human Dicer and Its Complexes with a Pre-miRNA Substrate. *Cell*  
777 173, 1191-1203.e12 (2018).
- 778 25. Park, J.-E. *et al.* Dicer recognizes the 5' end of RNA for efficient and accurate processing. *Nature* 475,  
779 201–205 (2011).
- 780 26. Gu, S. *et al.* The Loop Position of shRNAs and Pre-miRNAs Is Critical for the Accuracy of Dicer  
781 Processing In Vivo. *Cell* 151, 900–911 (2012).
- 782 27. Su, S. *et al.* Structural insights into dsRNA processing by Drosophila Dicer-2–Loqs-PD. *Nature* 1–8  
783 (2022) doi:10.1038/s41586-022-04911-x.
- 784 28. Sinha, N. K., Iwasa, J., Shen, P. S. & Bass, B. L. Dicer uses distinct modules for recognizing dsRNA  
785 termini. *Science* 359, 329–334 (2018).
- 786 29. Welker, N. C. *et al.* Dicer's Helicase Domain Discriminates dsRNA Termini to Promote an Altered  
787 Reaction Mode. *Mol Cell* 41, 589–599 (2011).
- 788 30. Sinha, N. K., Trettin, K. D., Aruscavage, P. J. & Bass, B. L. Drosophila Dicer-2 Cleavage Is Mediated by  
789 Helicase- and dsRNA Termini-Dependent States that Are Modulated by Loquacious-PD. *Mol Cell* 58, 406–  
790 417 (2015).

- 791 31. Jiang, F. *et al.* Dicer-1 and R3D1-L catalyze microRNA maturation in *Drosophila*. *Gene Dev* 19, 1674–  
792 1679 (2005).
- 793 32. Singh, R. K. *et al.* Transient kinetic studies of the antiviral *Drosophila* Dicer-2 reveal roles of ATP in  
794 self–nonself discrimination. *Elife* 10, e65810 (2021).
- 795 33. Naganuma, M., Tadakuma, H. & Tomari, Y. Single-molecule analysis of processive double-stranded  
796 RNA cleavage by *Drosophila* Dicer-2. *Nat Commun* 12, 4268 (2021).
- 797 34. Trettin, K. D., Sinha, N. K., Eckert, D. M., Apple, S. E. & Bass, B. L. Loquacious-PD facilitates *Drosophila*  
798 Dicer-2 cleavage through interactions with the helicase domain and dsRNA. *Proc National Acad Sci* 114,  
799 E7939–E7948 (2017).
- 800 35. Zhang, H., Kolb, F. A., Brondani, V., Billy, E. & Filipowicz, W. Human Dicer preferentially cleaves  
801 dsRNAs at their termini without a requirement for ATP. *Embo J* 21, 5875–5885 (2002).
- 802 36. Loo, Y.-M. & Gale, M. Immune Signaling by RIG-I-like Receptors. *Immunity* 34, 680–692 (2011).
- 803 37. Goubau, D., Deddouche, S. & Sousa, C. R. e. Cytosolic Sensing of Viruses. *Immunity* 38, 855–869  
804 (2013).
- 805 38. Ahmad, S. & Hur, S. Helicases in Antiviral Immunity: Dual Properties as Sensors and Effectors. *Trends*  
806 *Biochem Sci* 40, 576–585 (2015).
- 807 39. Luo, D. *et al.* Structural Insights into RNA Recognition by RIG-I. *Cell* 147, 409–422 (2011).
- 808 40. Veen, A. G. van der *et al.* The RIG-I-like receptor LGP2 inhibits Dicer-dependent processing of long  
809 double-stranded RNA and blocks RNA interference in mammalian cells. *Embo J* 37, e97479 (2018).
- 810 41. Rehwinkel, J. & Gack, M. U. RIG-I-like receptors: their regulation and roles in RNA sensing. *Nat Rev*  
811 *Immunol* 20, 1–15 (2020).
- 812 42. Mukherjee, K., Campos, H. & Kolaczowski, B. Evolution of Animal and Plant Dicers: Early Parallel  
813 Duplications and Recurrent Adaptation of Antiviral RNA Binding in Plants. *Mol Biol Evol* 30, 627–641  
814 (2013).
- 815 43. Sinha, N. K. & Bass, B. L. Overexpression and purification of Dicer and accessory proteins for  
816 biochemical and structural studies. *Methods* 126, 54–65 (2017).
- 817 44. Tóth, J., Bollins, J. & Szczelkun, M. D. Re-evaluating the kinetics of ATP hydrolysis during initiation of  
818 DNA sliding by Type III restriction enzymes. *Nucleic Acids Res* 43, 10870–10881 (2015).
- 819 45. Dehal, P. & Boore, J. L. Two Rounds of Whole Genome Duplication in the Ancestral Vertebrate. *Plos*  
820 *Biol* 3, e314 (2005).
- 821 46. Secombes, C. J. & Zou, J. Evolution of Interferons and Interferon Receptors. *Front Immunol* 8, 209  
822 (2017).

- 823 47. Qiao, X., Wang, L. & Song, L. The primitive interferon-like system and its antiviral function in  
824 molluscs. *Dev Comp Immunol* 118, 103997 (2021).
- 825 48. Berezikov, E. Evolution of microRNA diversity and regulation in animals. *Nat Rev Genet* 12, 846–860  
826 (2011).
- 827 49. Hellman, L. M. & Fried, M. G. Electrophoretic mobility shift assay (EMSA) for detecting protein–  
828 nucleic acid interactions. *Nat Protoc* 2, 1849–1861 (2007).
- 829 50. Rio, D. C. Electrophoretic Mobility Shift Assays for RNA–Protein Complexes. *Cold Spring Harb Protoc*  
830 2014, pdb.prot080721 (2014).
- 831 51. Tian, Y. *et al.* A Phosphate-Binding Pocket within the Platform-PAZ-Connector Helix Cassette of  
832 Human Dicer. *Mol Cell* 53, 606–616 (2014).
- 833 52. Ma, E., Zhou, K., Kidwell, M. A. & Doudna, J. A. Coordinated Activities of Human Dicer Domains in  
834 Regulatory RNA Processing. *J Mol Biol* 422, 466–476 (2012).
- 835 53. Patel, A. *et al.* ATP as a biological hydrotrope. *Science* 356, 753–756 (2017).
- 836 54. Donelick, H. M. *et al.* In vitro studies provide insight into effects of Dicer-2 helicase mutations in  
837 *Drosophila melanogaster*. *Rna* 26, 1847–1861 (2020).
- 838 55. Ashe, A. *et al.* A deletion polymorphism in the *Caenorhabditis elegans* RIG-I homolog disables viral  
839 RNA dicing and antiviral immunity. *Elife* 2, e00994 (2013).
- 840 56. Li, Y. *et al.* Induction and suppression of antiviral RNA interference by influenza A virus in  
841 mammalian cells. *Nat Microbiol* 2, 16250 (2016).
- 842 57. Zapletal, D. *et al.* Structural and functional basis of mammalian microRNA biogenesis by Dicer. *Mol*  
843 *Cell* 82, 4064-4079.e13 (2022).
- 844 58. Luo, D., Kohlway, A. & Pyle, A. M. Duplex RNA activated ATPases (DRAs). *Rna Biol* 10, 111–120  
845 (2013).
- 846 59. Fairman-Williams, M. E., Guenther, U.-P. & Jankowsky, E. SF1 and SF2 helicases: family matters. *Curr*  
847 *Opin Struc Biol* 20, 313–324 (2010).
- 848 60. Shabalina, S. A. & Koonin, E. V. Origins and evolution of eukaryotic RNA interference. *Trends Ecol*  
849 *Evol* 23, 578–587 (2008).
- 850 61. Liu, G., Zhang, H., Zhao, C. & Zhang, H. Evolutionary history of the Toll-like receptor gene family  
851 across vertebrates. *Genome Biol Evol* 12, 3615–3634 (2019).
- 852 62. Seo, G. J. *et al.* Reciprocal Inhibition between Intracellular Antiviral Signaling and the RNAi Machinery  
853 in Mammalian Cells. *Cell Host Microbe* 14, 435–445 (2013).

- 854 63. Gurung, C. *et al.* Dicer represses the interferon response and the double-stranded RNA-activated  
855 protein kinase pathway in mouse embryonic stem cells. *J Biological Chem* 296, 100264 (2021).
- 856 64. Witteveldt, J., Knol, L. I. & Macias, S. MicroRNA-deficient mouse embryonic stem cells acquire a  
857 functional interferon response. *Elife* 8, e44171 (2019).
- 858 65. Story, R. M. & Steitz, T. A. Structure of the recA protein–ADP complex. *Nature* 355, 374–376 (1992).
- 859 66. Tian, H. *et al.* Structural basis of Zika virus helicase in recognizing its substrates. *Protein Cell* 7, 562–  
860 570 (2016).
- 861 67. tenOever, B. R. Questioning antiviral RNAi in mammals. *Nat Microbiol* 2, 17052 (2017).
- 862 68. Maillard, P. V. *et al.* Antiviral RNA Interference in Mammalian Cells. *Science* 342, 235–238 (2013).
- 863 69. Maillard, P. V. *et al.* Inactivation of the type I interferon pathway reveals long double-stranded RNA-  
864 mediated RNA interference in mammalian cells. *Embo J* 35, 2505–2518 (2016).
- 865 70. Parameswaran, P. *et al.* Six RNA Viruses and Forty-One Hosts: Viral Small RNAs and Modulation of  
866 Small RNA Repertoires in Vertebrate and Invertebrate Systems. *Plos Pathog* 6, e1000764 (2010).
- 867 71. Poirier, E. Z. *et al.* An isoform of Dicer protects mammalian stem cells against multiple RNA viruses.  
868 *Science* 373, 231–236 (2021).
- 869 72. Flemr, M. *et al.* A Retrotransposon-Driven Dicer Isoform Directs Endogenous Small Interfering RNA  
870 Production in Mouse Oocytes. *Cell* 155, 807–816 (2013).
- 871 73. McGinnis, S. & Madden, T. L. BLAST: at the core of a powerful and diverse set of sequence analysis  
872 tools. *Nucleic Acids Res* 32, W20–W25 (2004).
- 873 74. Li, W. & Godzik, A. Cd-hit: a fast program for clustering and comparing large sets of protein or  
874 nucleotide sequences. *Bioinformatics* 22, 1658–1659 (2006).
- 875 75. Katoh, K. & Standley, D. M. MAFFT Multiple Sequence Alignment Software Version 7: Improvements  
876 in Performance and Usability. *Mol Biol Evol* 30, 772–780 (2013).
- 877 76. Marchler-Bauer, A. *et al.* CDD: a conserved domain database for interactive domain family analysis.  
878 *Nucleic Acids Res* 35, D237–D240 (2007).
- 879 77. Löytynoja, A. & Goldman, N. Phylogeny-Aware Gap Placement Prevents Errors in Sequence  
880 Alignment and Evolutionary Analysis. *Science* 320, 1632–1635 (2008).
- 881 78. Darriba, D., Taboada, G. L., Doallo, R. & Posada, D. ProtTest 3: fast selection of best-fit models of  
882 protein evolution. *Bioinformatics* 27, 1164–1165 (2011).
- 883 79. Kozlov, A. M., Darriba, D., Flouri, T., Morel, B. & Stamatakis, A. RAXML-NG: a fast, scalable and user-  
884 friendly tool for maximum likelihood phylogenetic inference. *Bioinformatics* 35, 4453–4455 (2019).

- 885 80. Lemoine, F. *et al.* Renewing Felsenstein’s Phylogenetic Bootstrap in the Era of Big Data. *Nature* 556,  
886 452–456 (2018).
- 887 81. Vialle, R. A., Tamuri, A. U. & Goldman, N. Alignment Modulates Ancestral Sequence Reconstruction  
888 Accuracy. *Mol Biol Evol* 35, 1783–1797 (2018).
- 889 82. Löytynoja, A. Multiple Sequence Alignment Methods. *Methods Mol Biology* 1079, 155–170 (2013).
- 890 83. Aadland, K., Pugh, C. & Kolaczkowski, B. Computational Methods in Protein Evolution. *Methods Mol*  
891 *Biology* 1851, 135–170 (2018).
- 892 84. Mulvania, T., Hayes, B. & Hedin, D. A Flow Cytometric Assay for Rapid, Accurate Determination of  
893 Baculovirus Titers. *Bioprocess J* 3, 47–53 (2004).
- 894 85. Jarmoskaite, I., AlSadhan, I., Vaidyanathan, P. P. & Herschlag, D. How to measure and evaluate  
895 binding affinities. *Elife* 9, e57264 (2020).
- 896 86. Robert, X. & Gouet, P. Deciphering key features in protein structures with the new ENDscript server.  
897 *Nucleic Acids Res* 42, W320–W324 (2014).

898

899

900

901

902

903

904

905

906

907

A

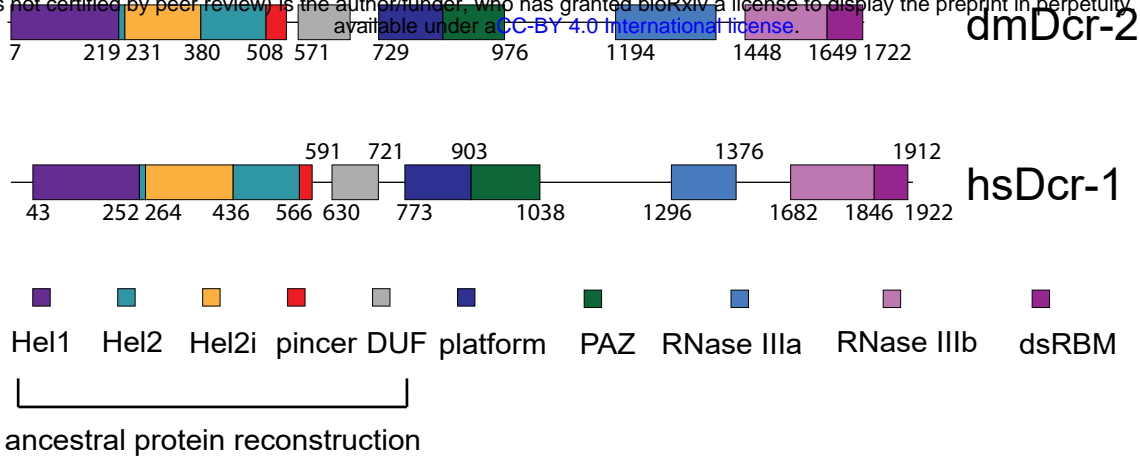

B

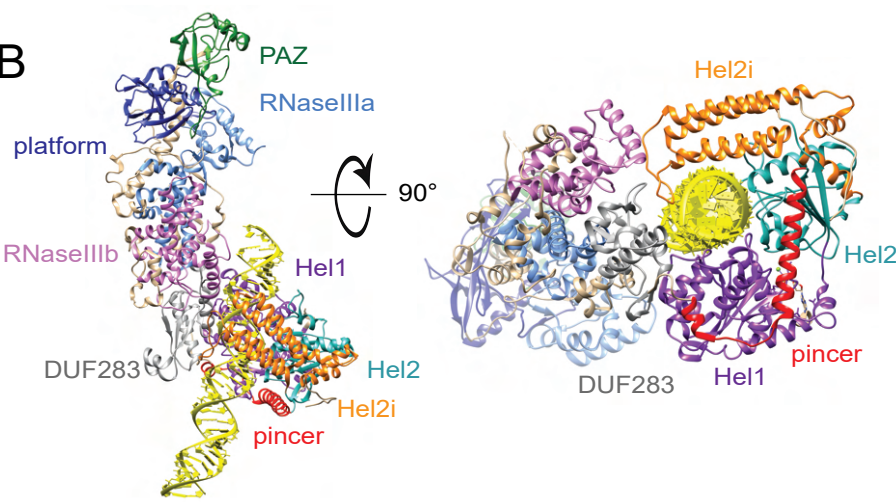

C

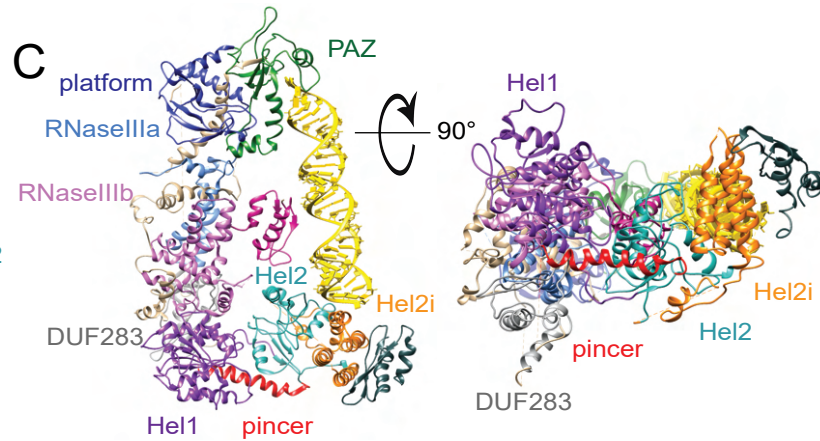

D

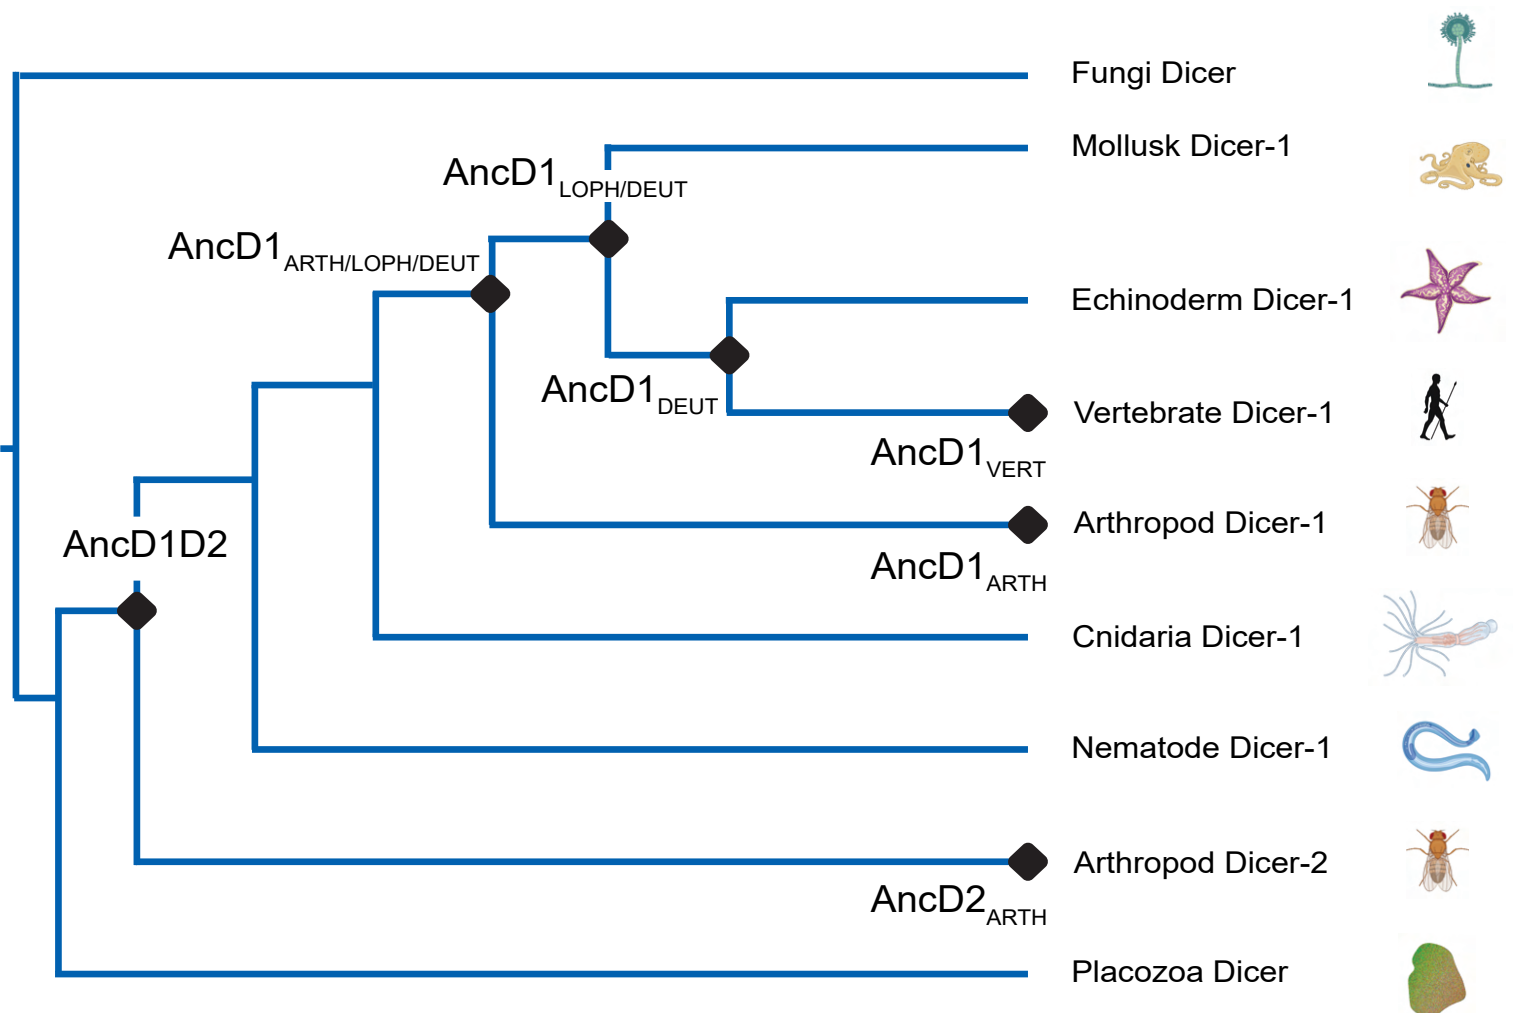

Figure 1

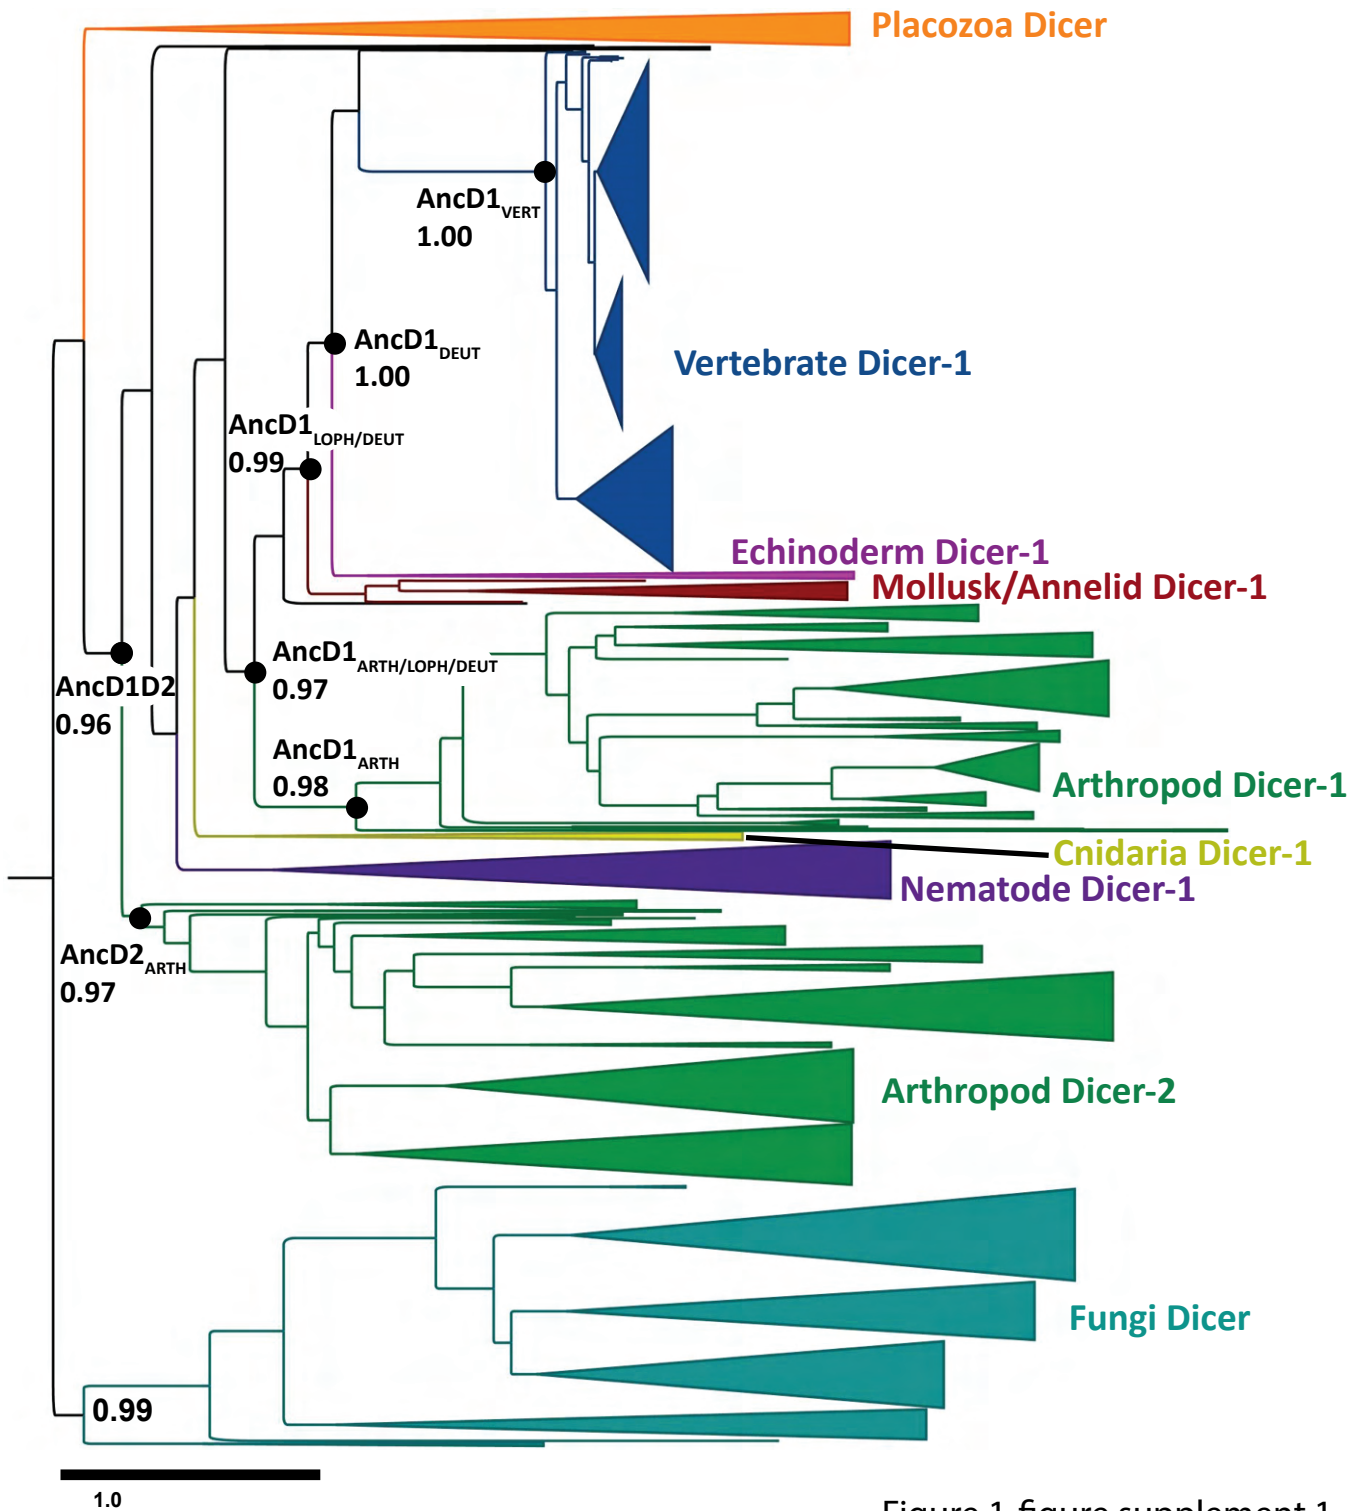

Figure 1-figure supplement 1



A

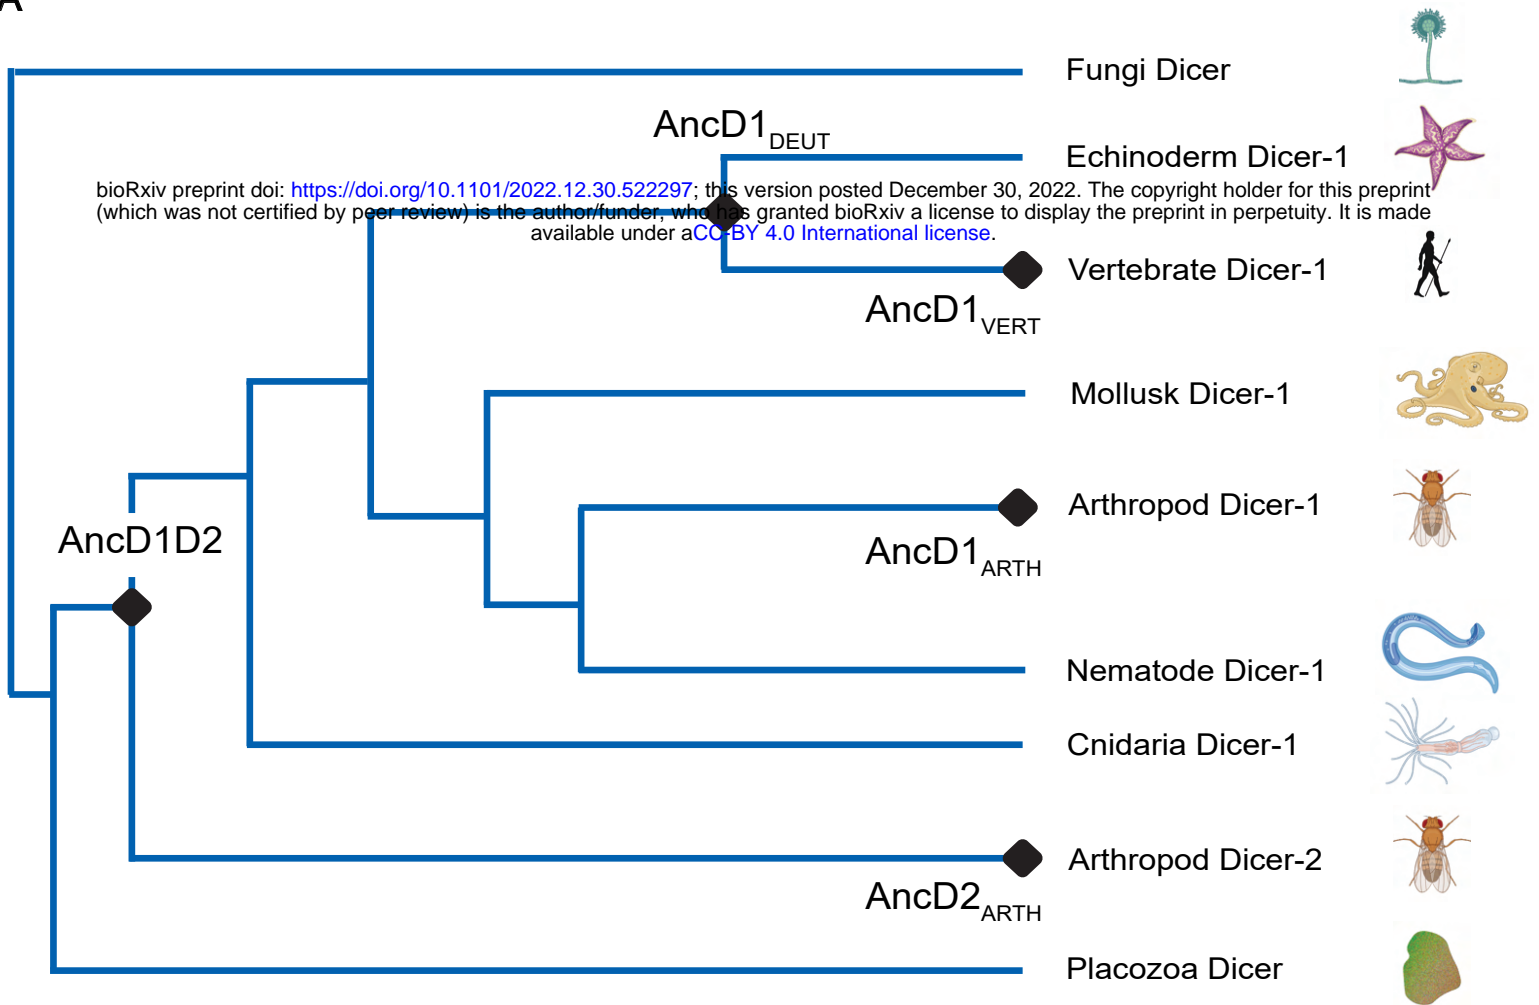

B

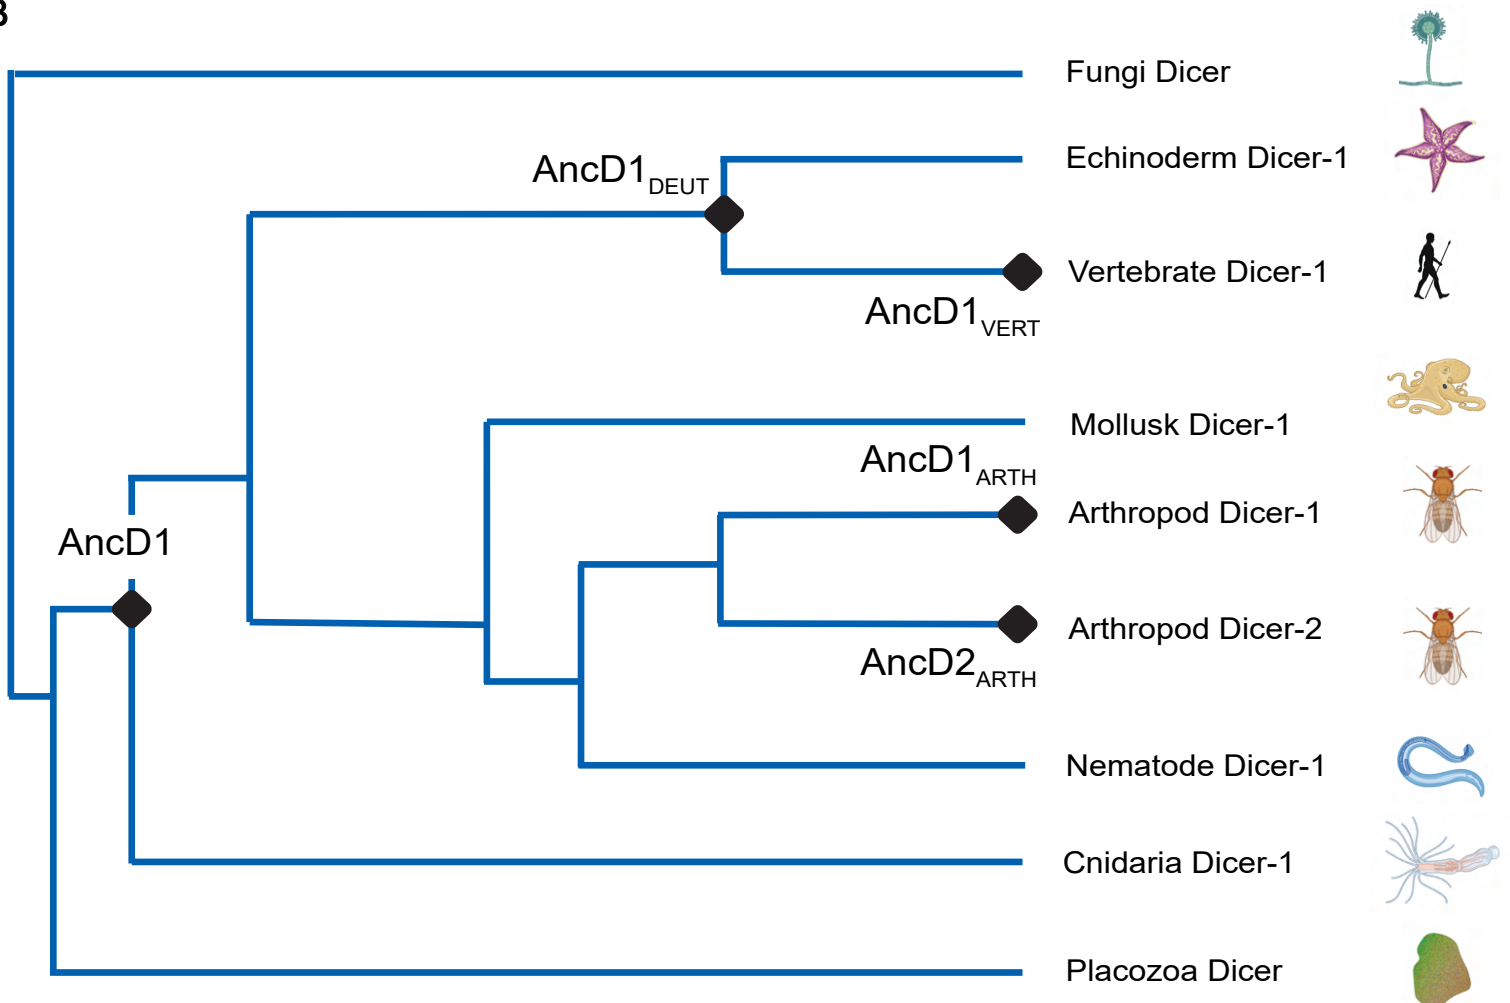

A

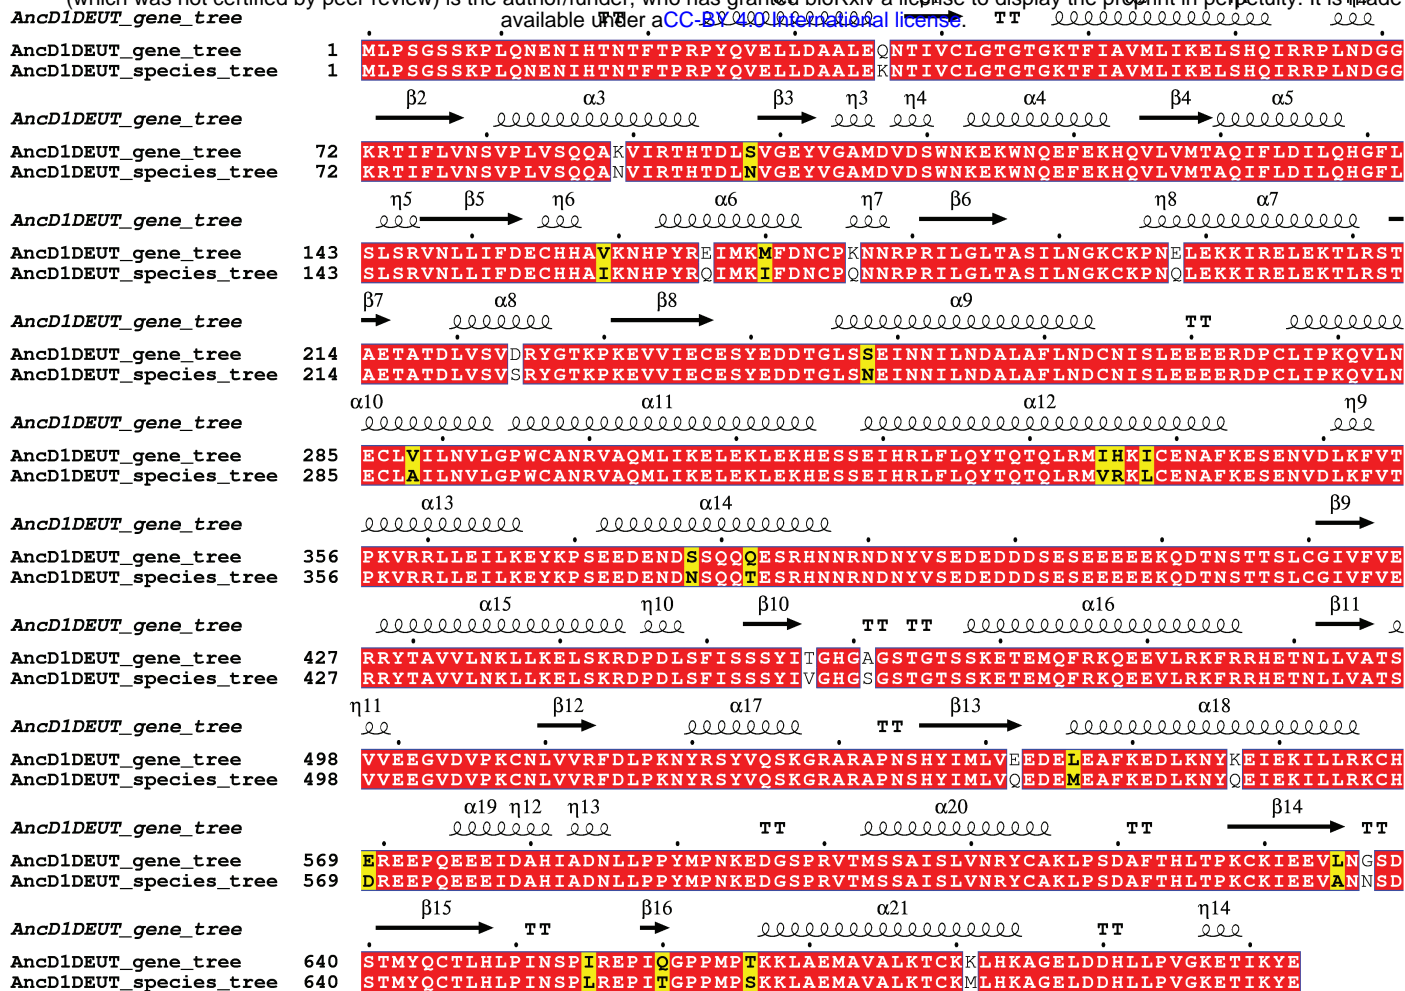

B

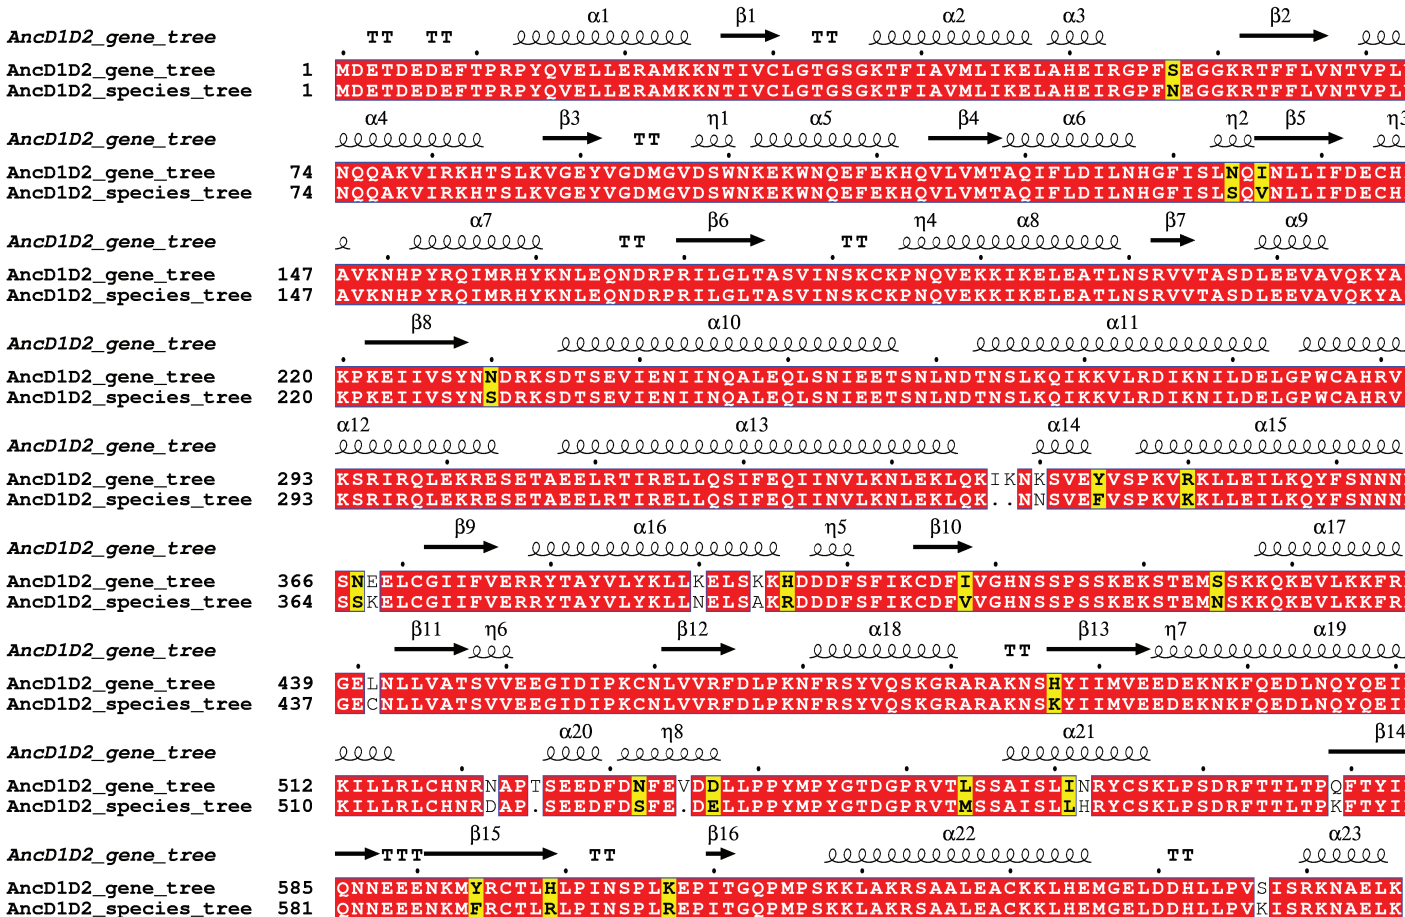

Figure 1-figure supplement 3

**A**

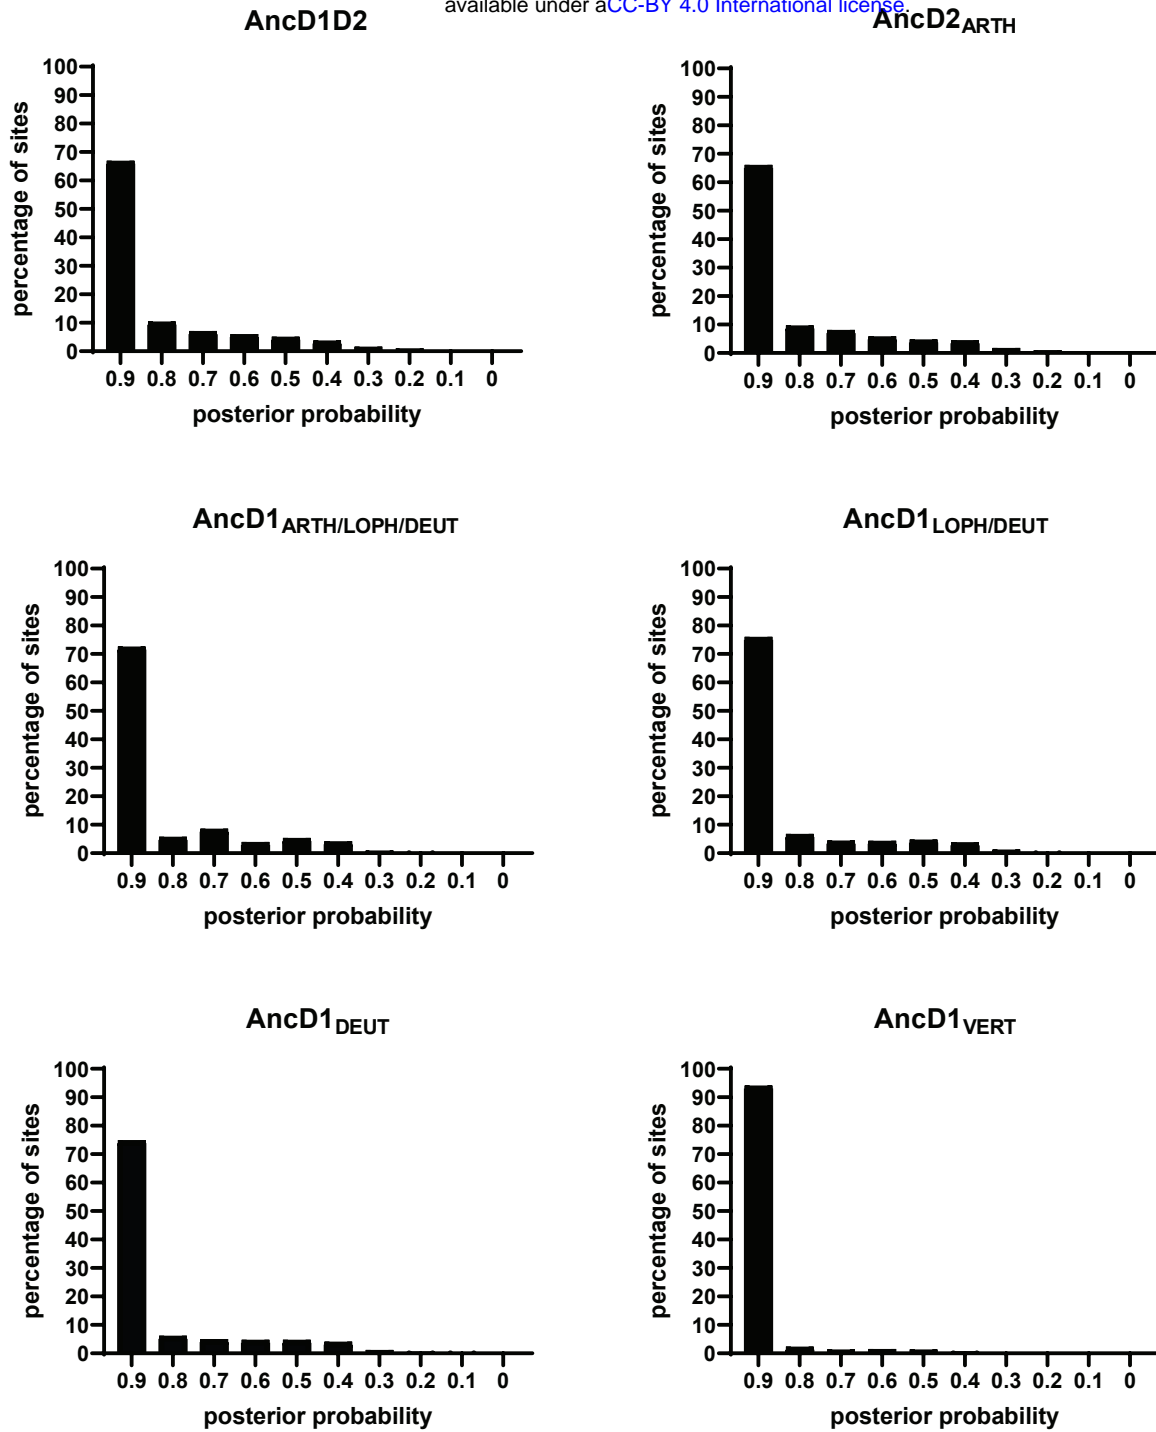

**B**

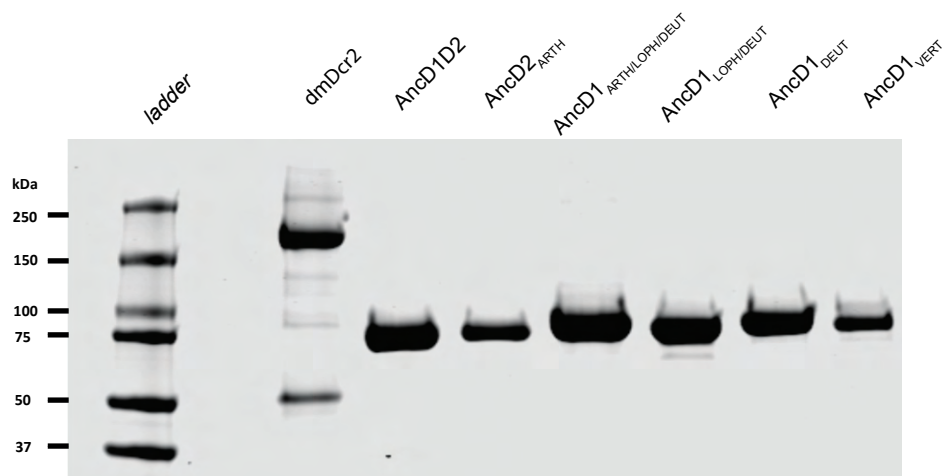

Figure 1-figure supplement 4

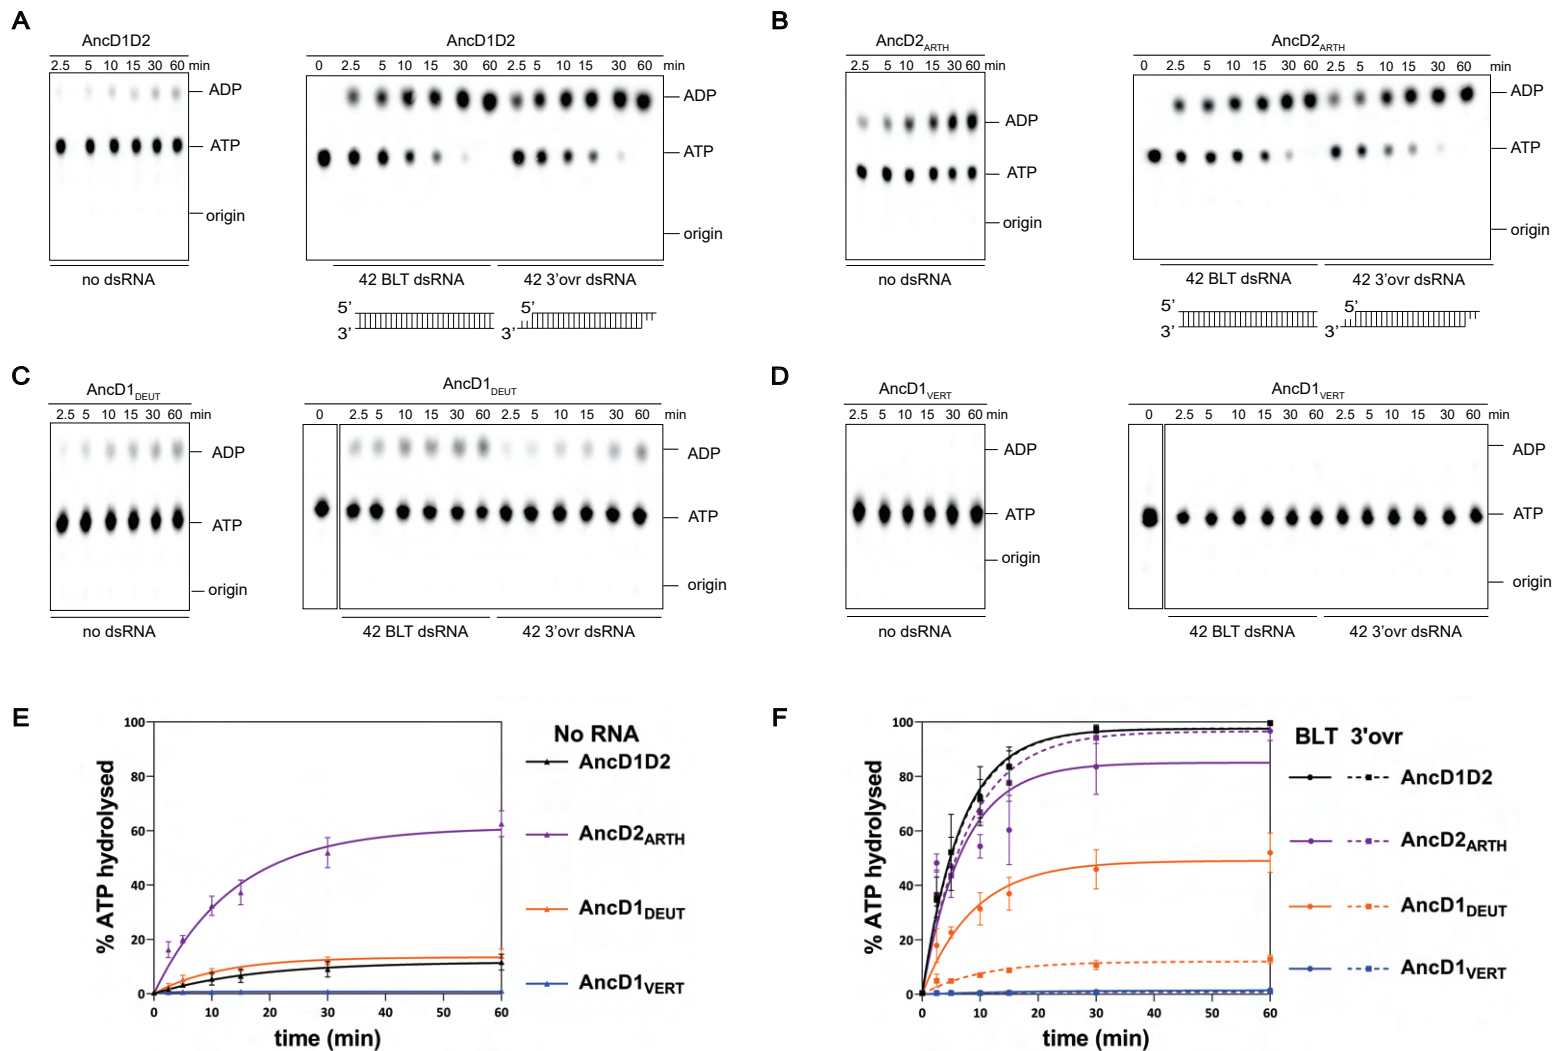

Figure 2

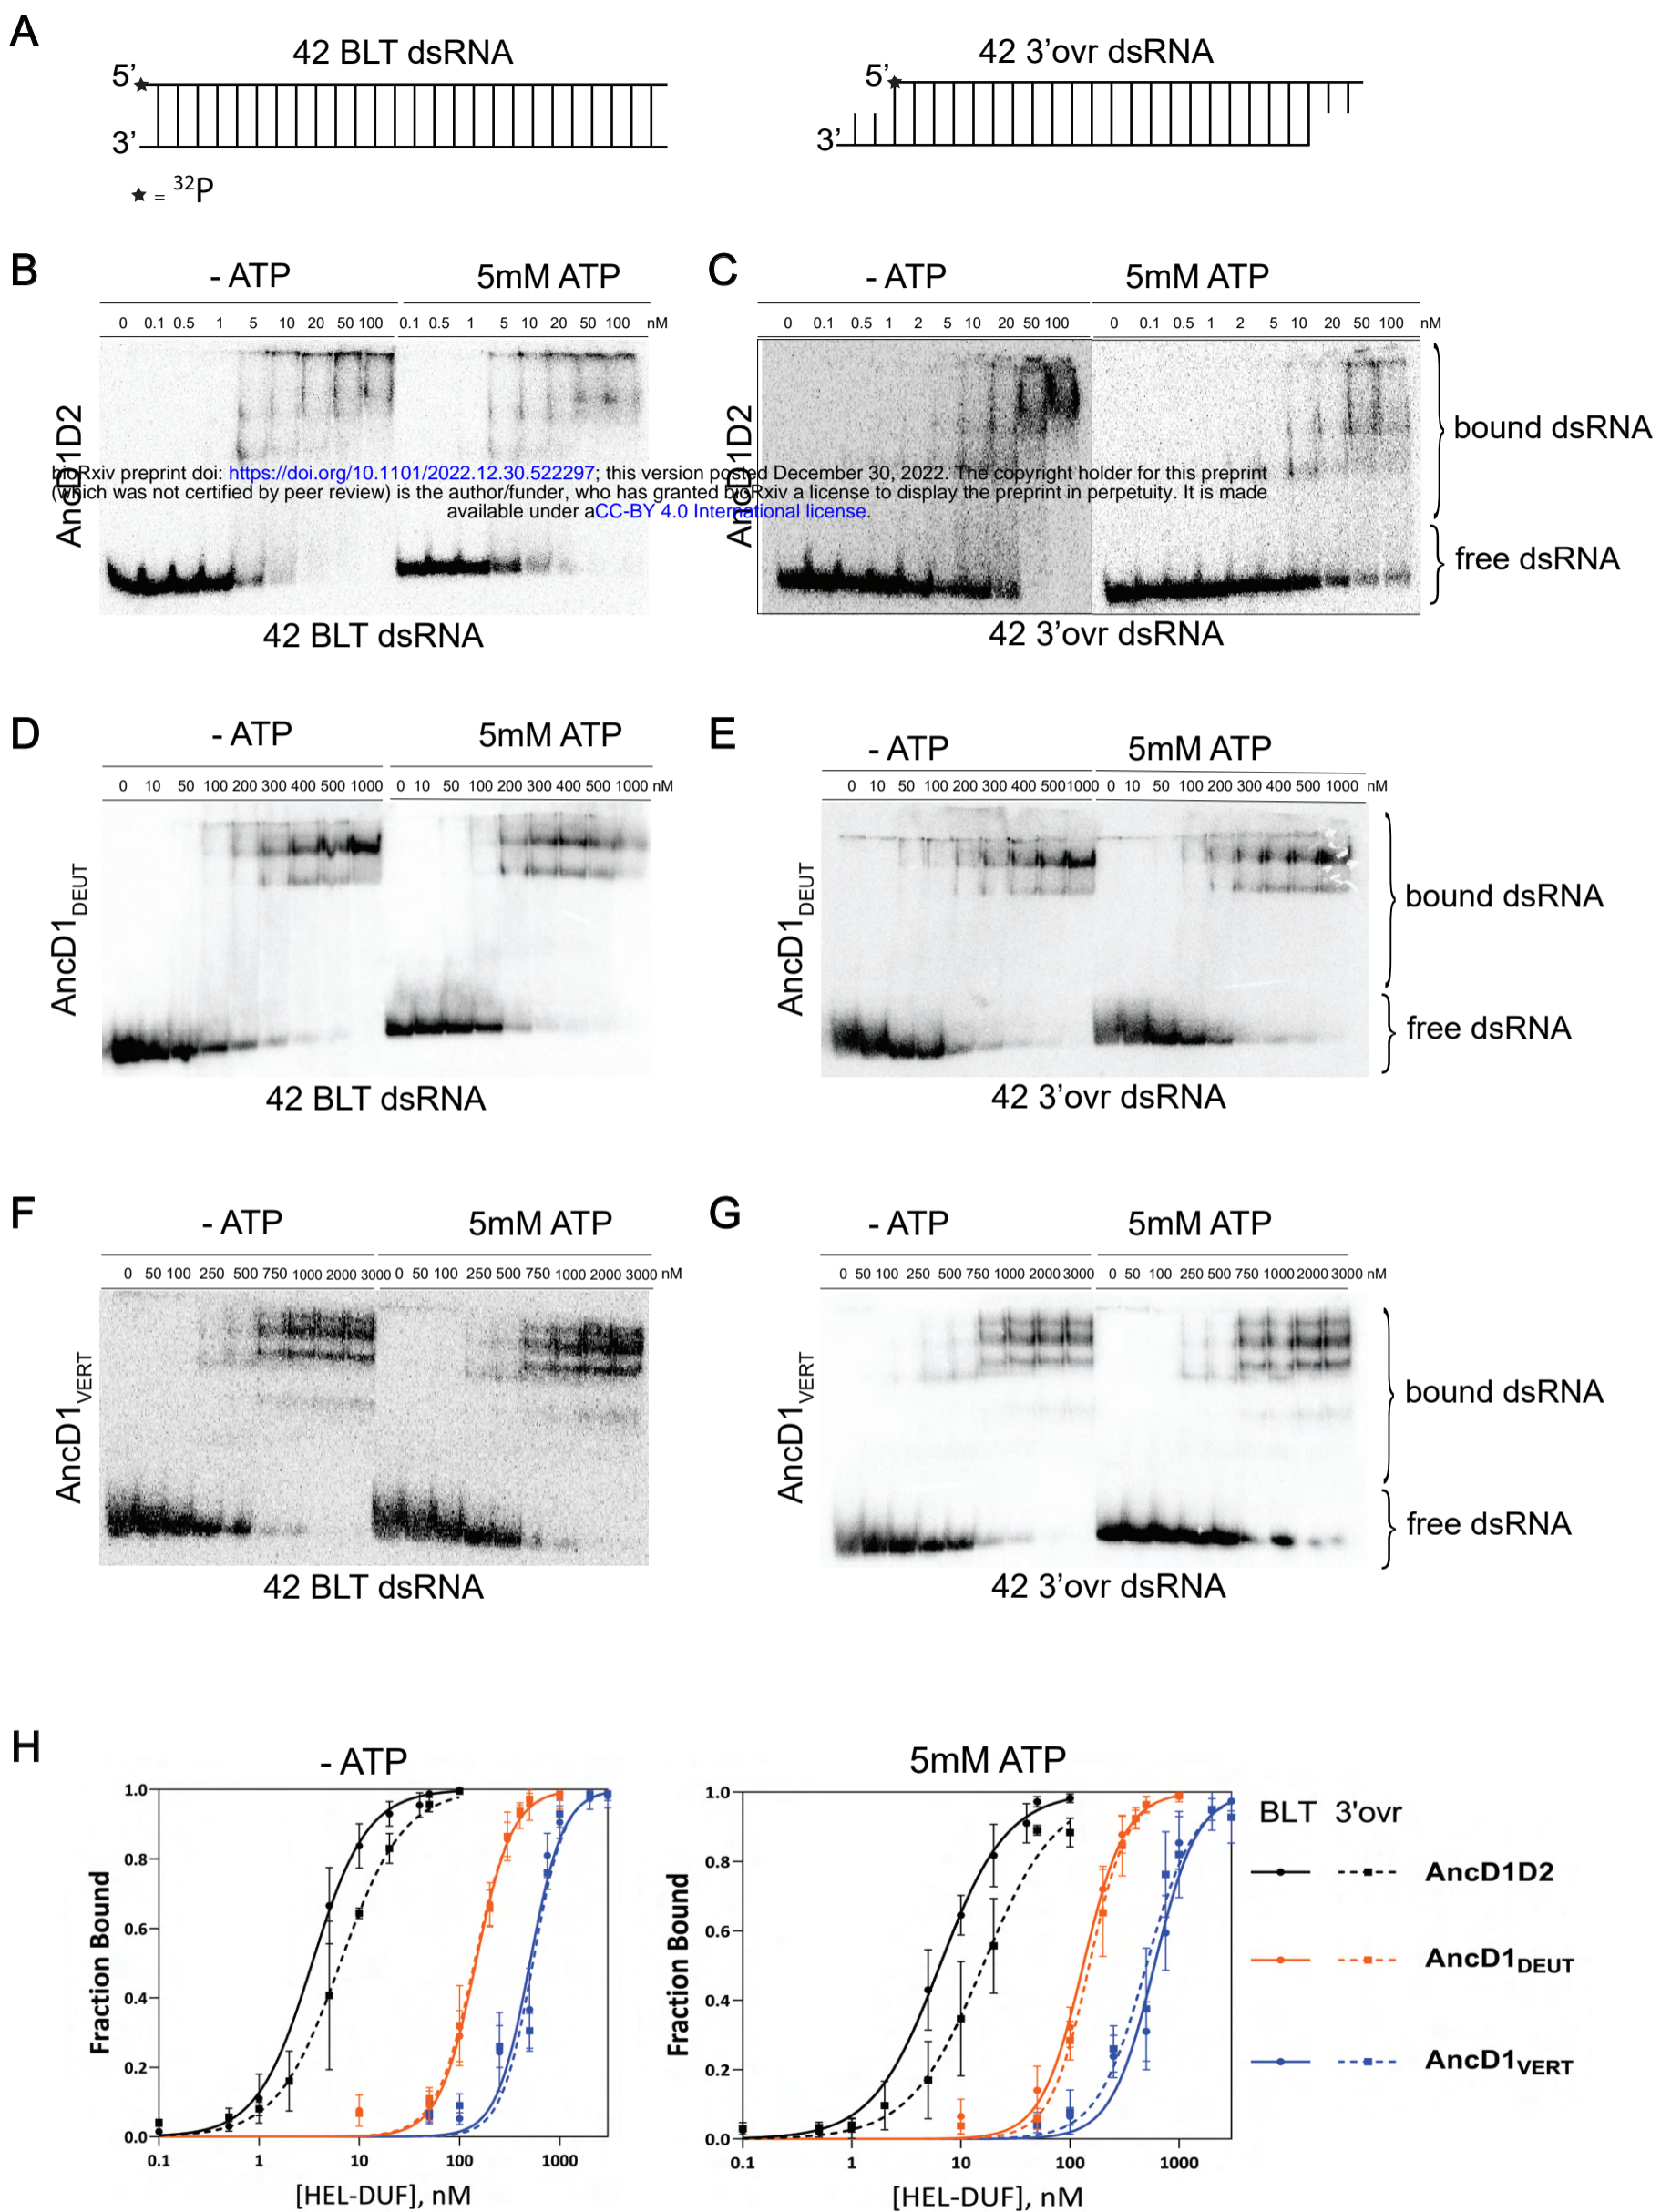

Figure 3

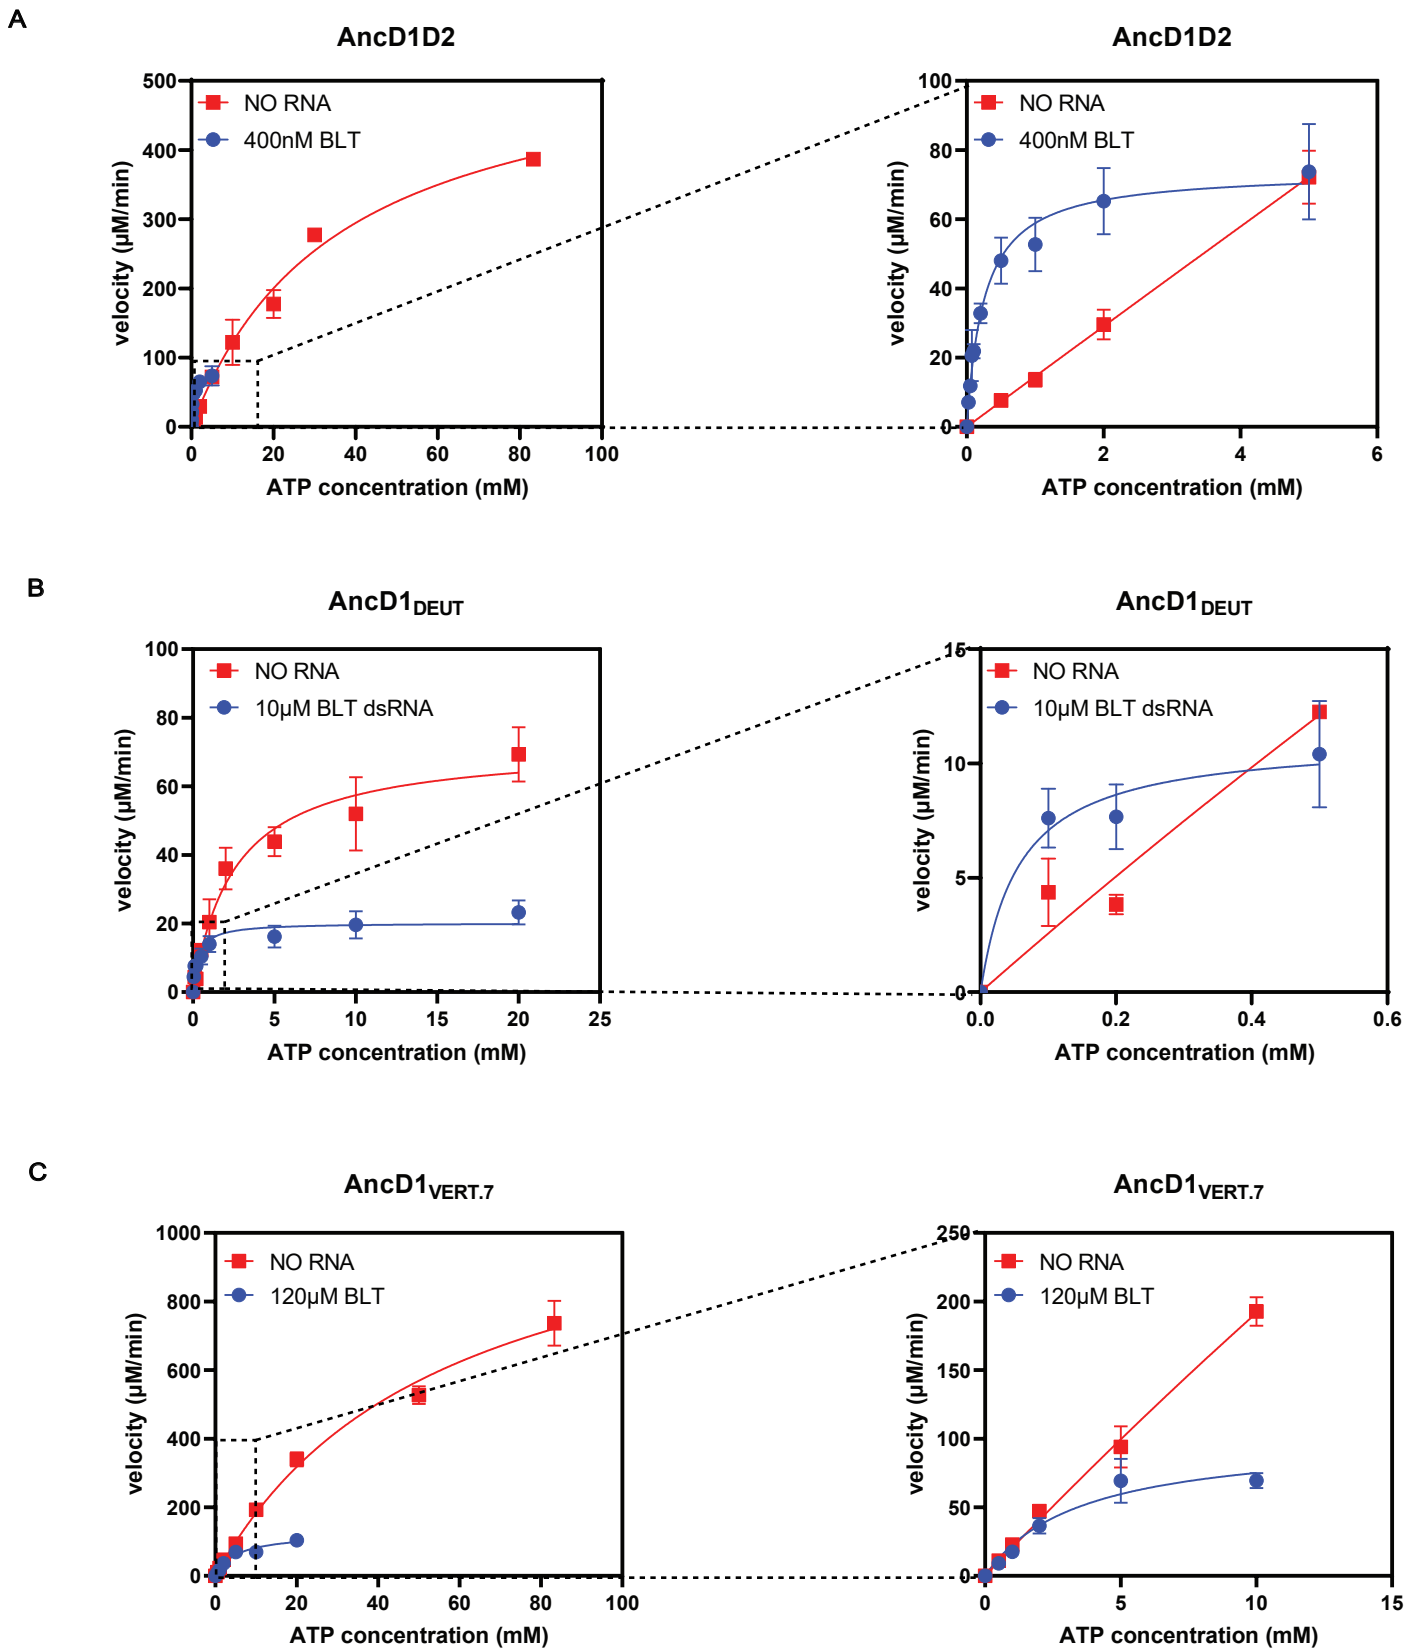

Figure 4

**A** AncD1D2 500nM no RNA added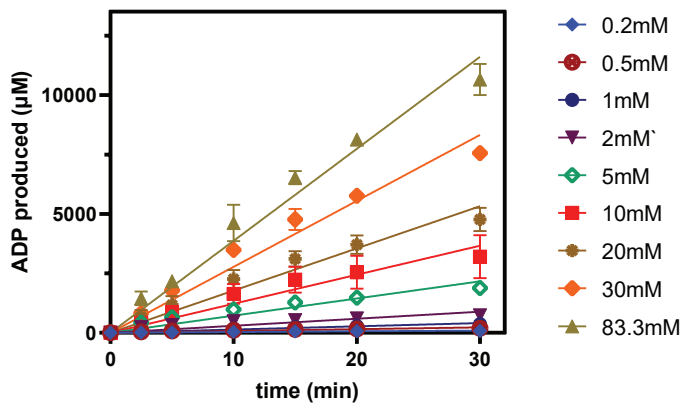**B** AncD1D2 100nM BLT dsRNA 400nM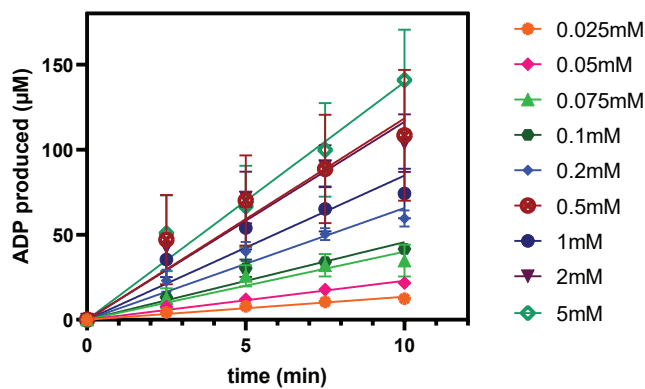**C**AncD1<sub>DEUT</sub> 500nM no RNA added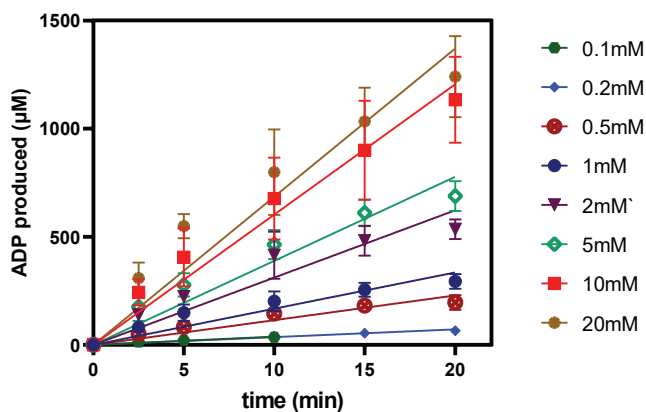**D**AncD1<sub>DEUT</sub> 500nM BLT dsRNA 10 $\mu\text{M}$ 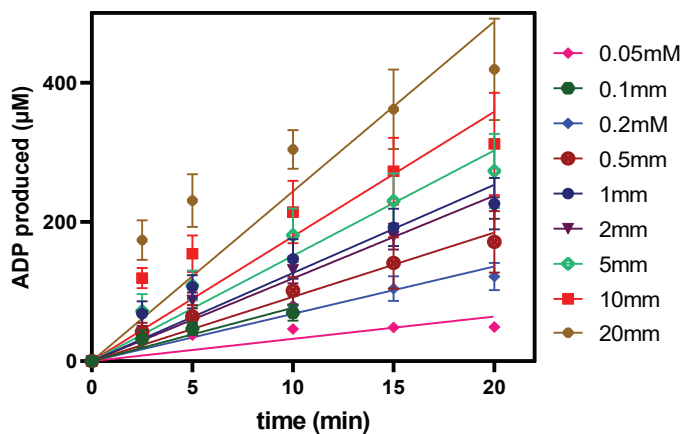**E**AncD1<sub>VERT.7</sub> 5 $\mu\text{M}$  no RNA added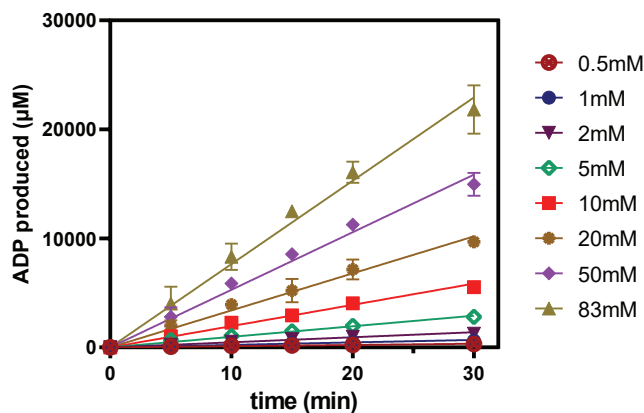**F**AncD1<sub>VERT.7</sub> 5 $\mu\text{M}$  BLT dsRNA 120 $\mu\text{M}$ 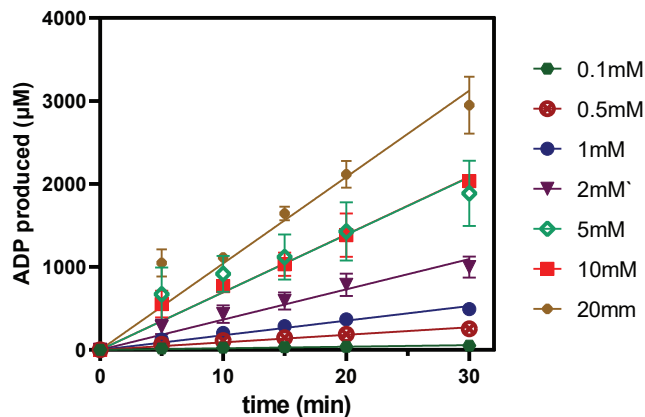

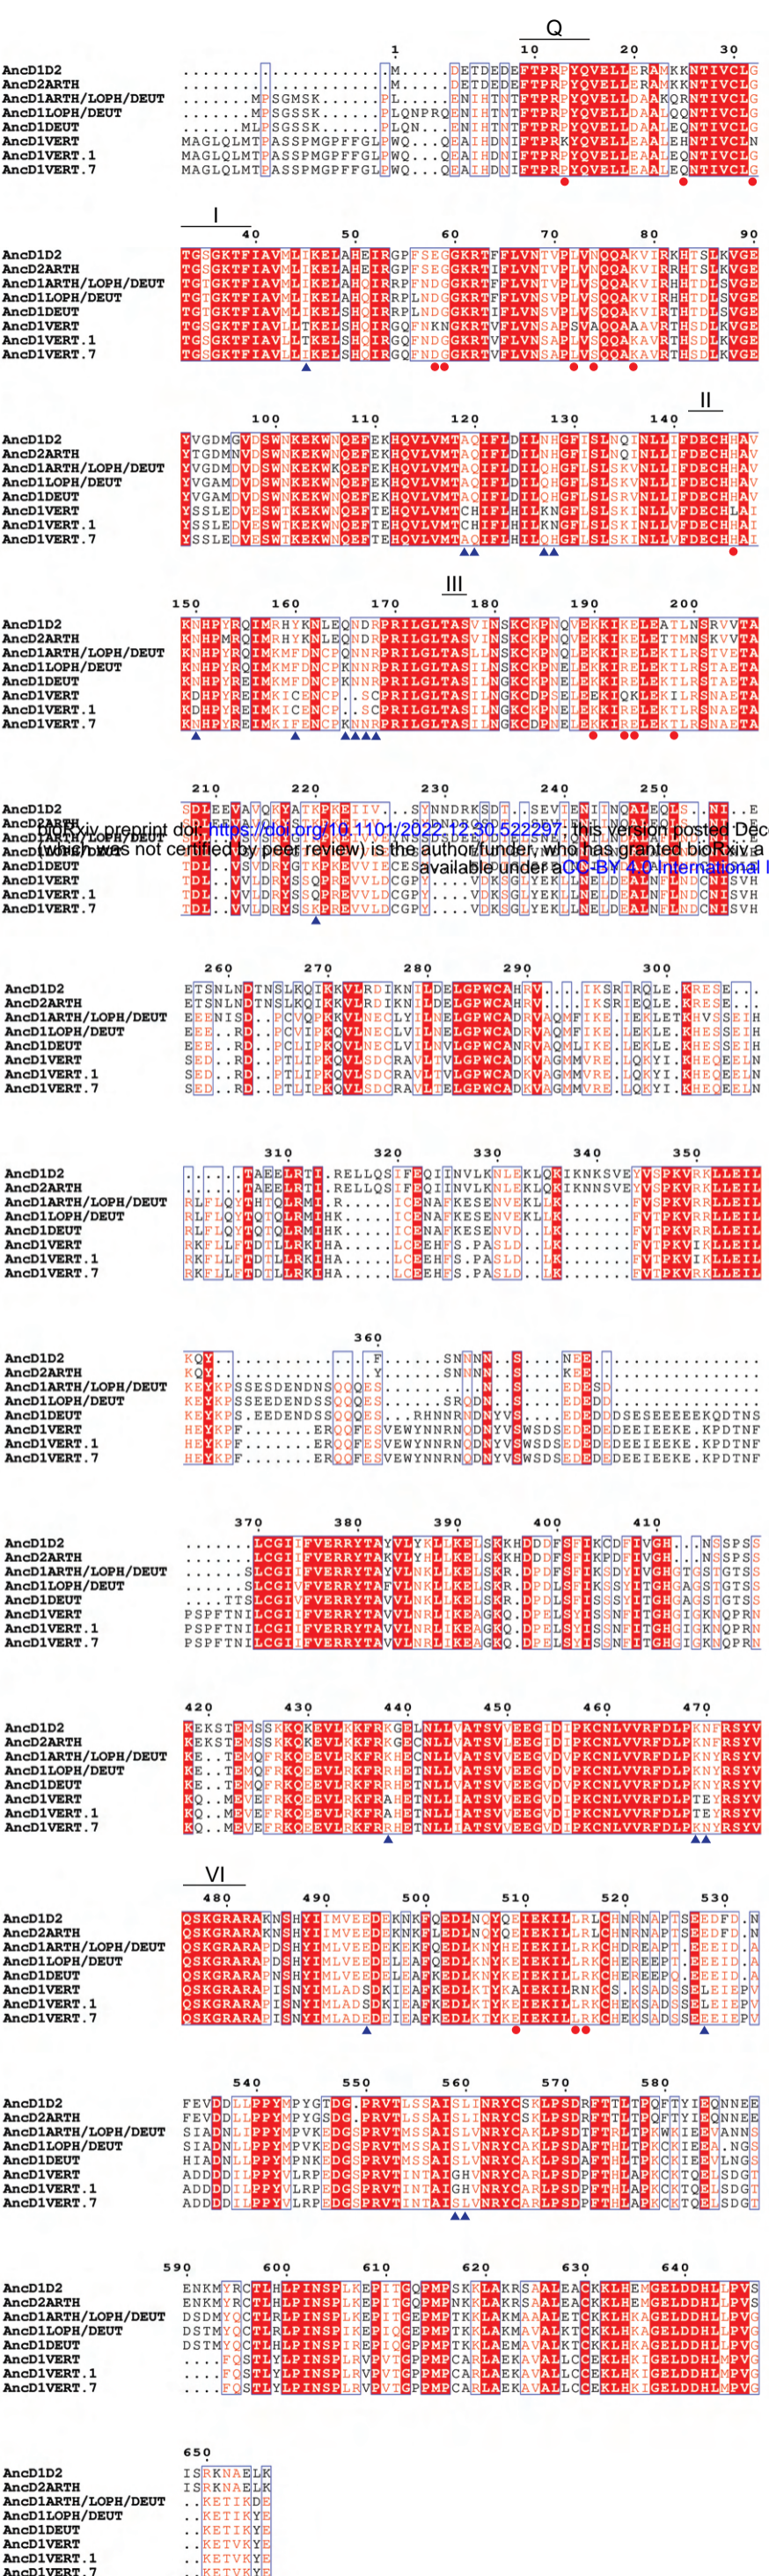

Figure 4-figure supplement 2



**A**

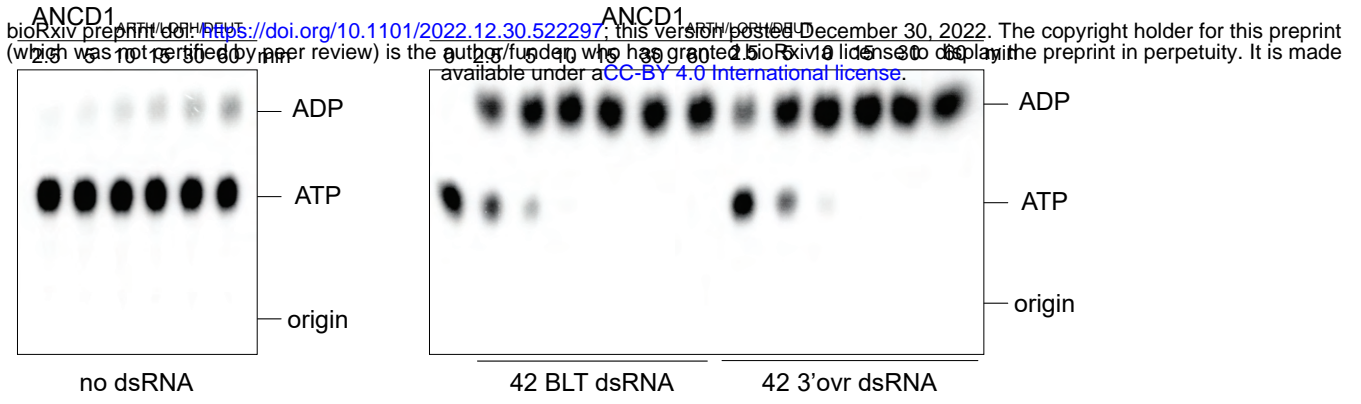

**B**

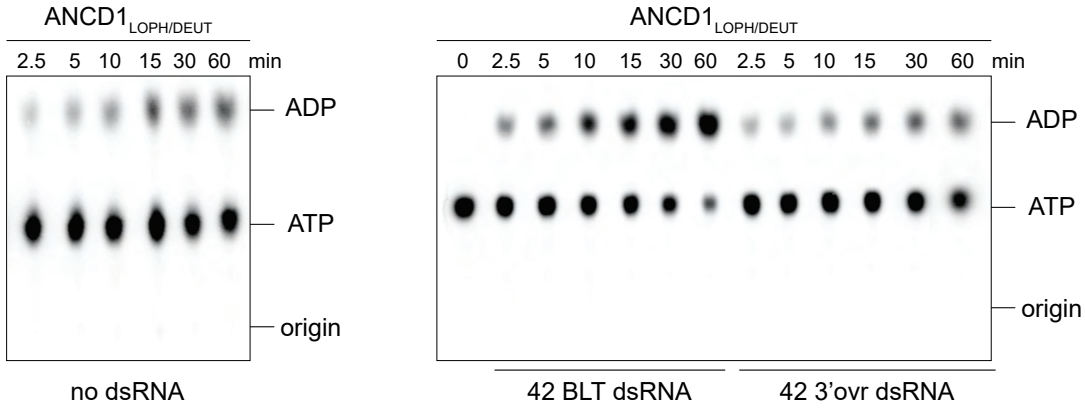

**C**

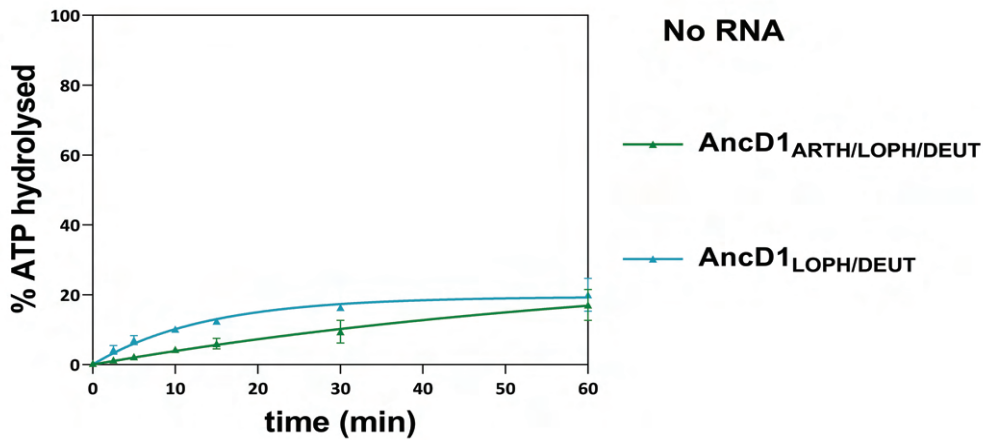

**D**

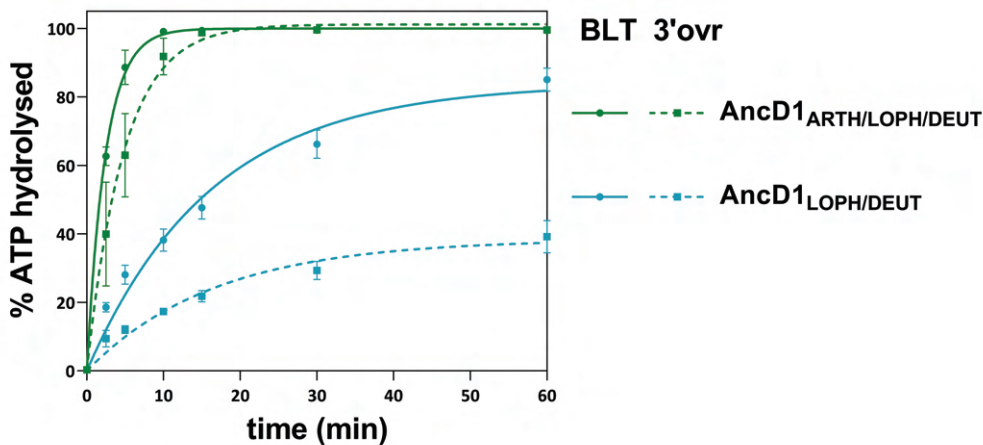

Figure 4-figure supplement 3

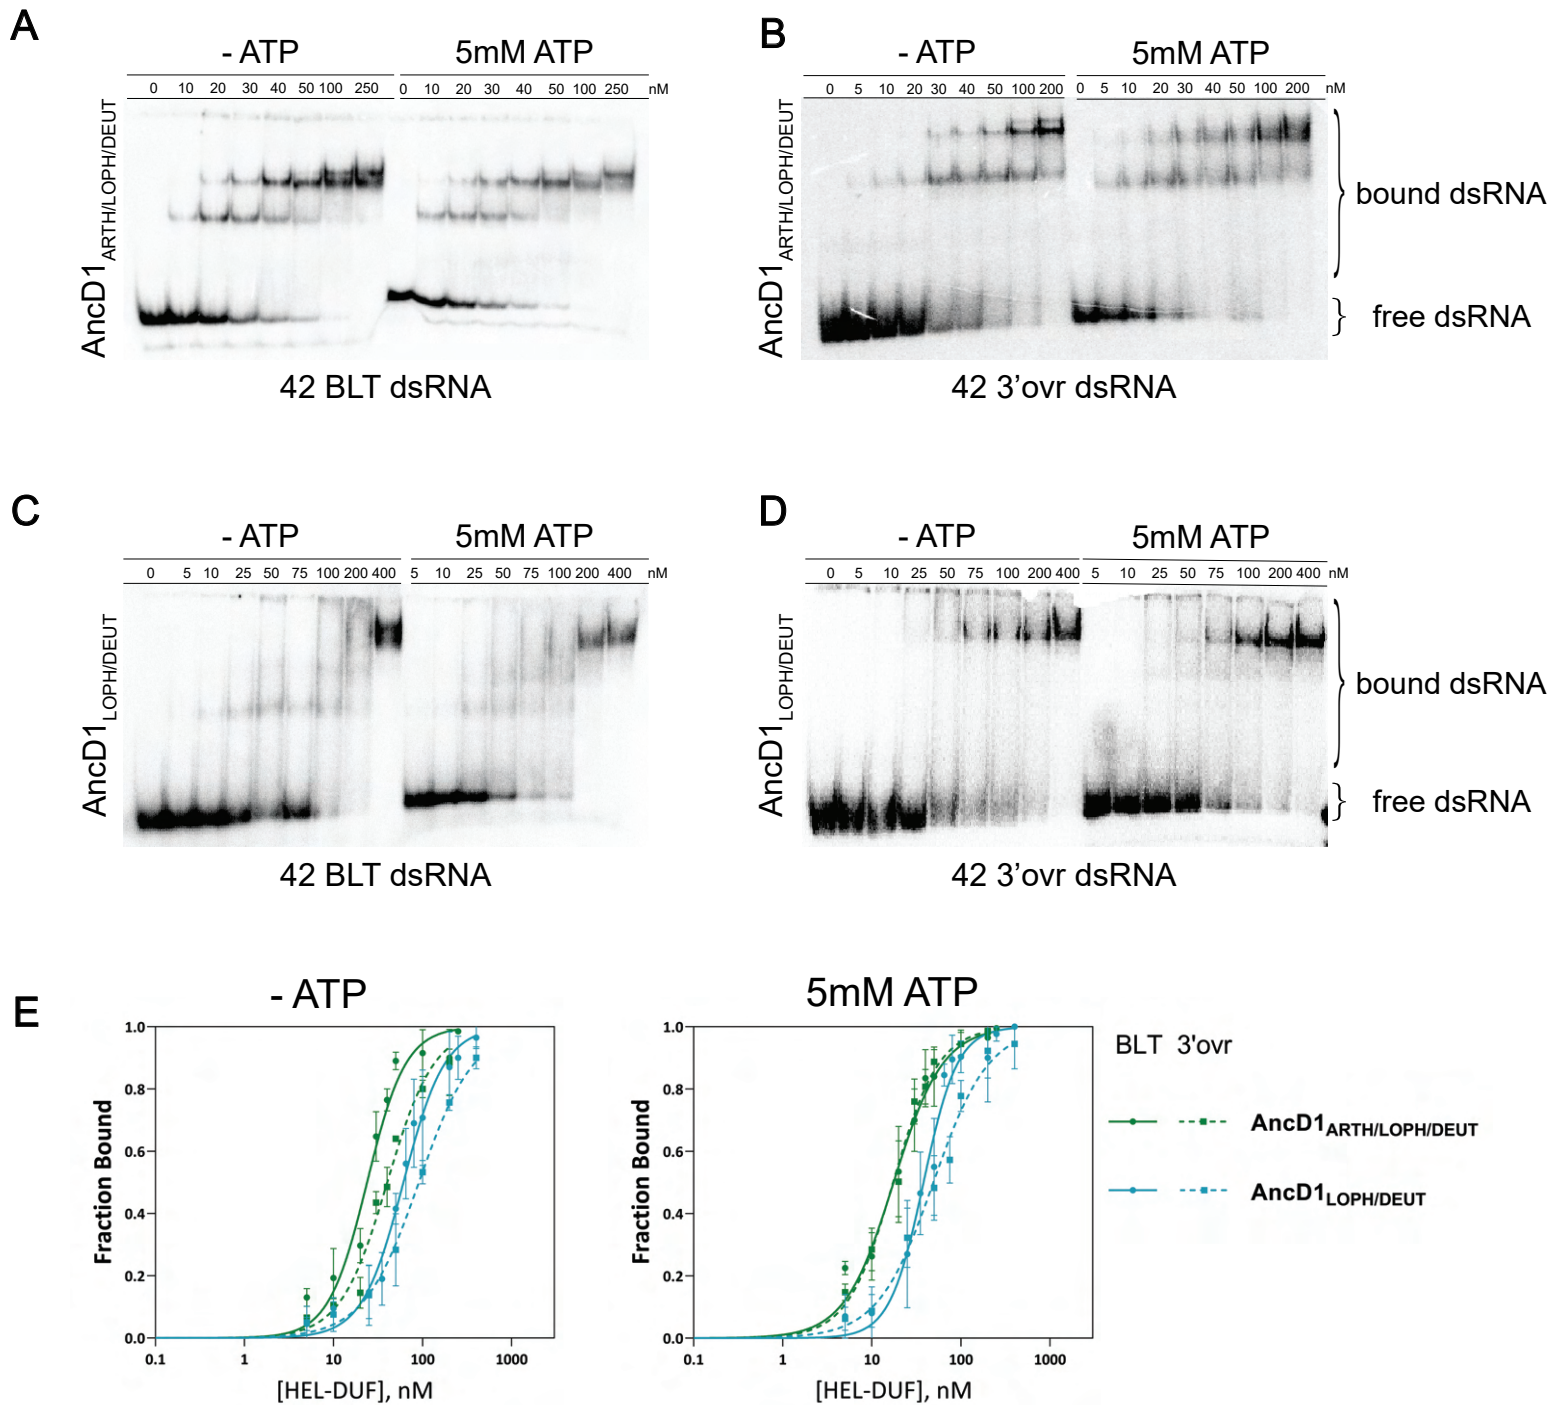

Figure 4-figure supplement 4

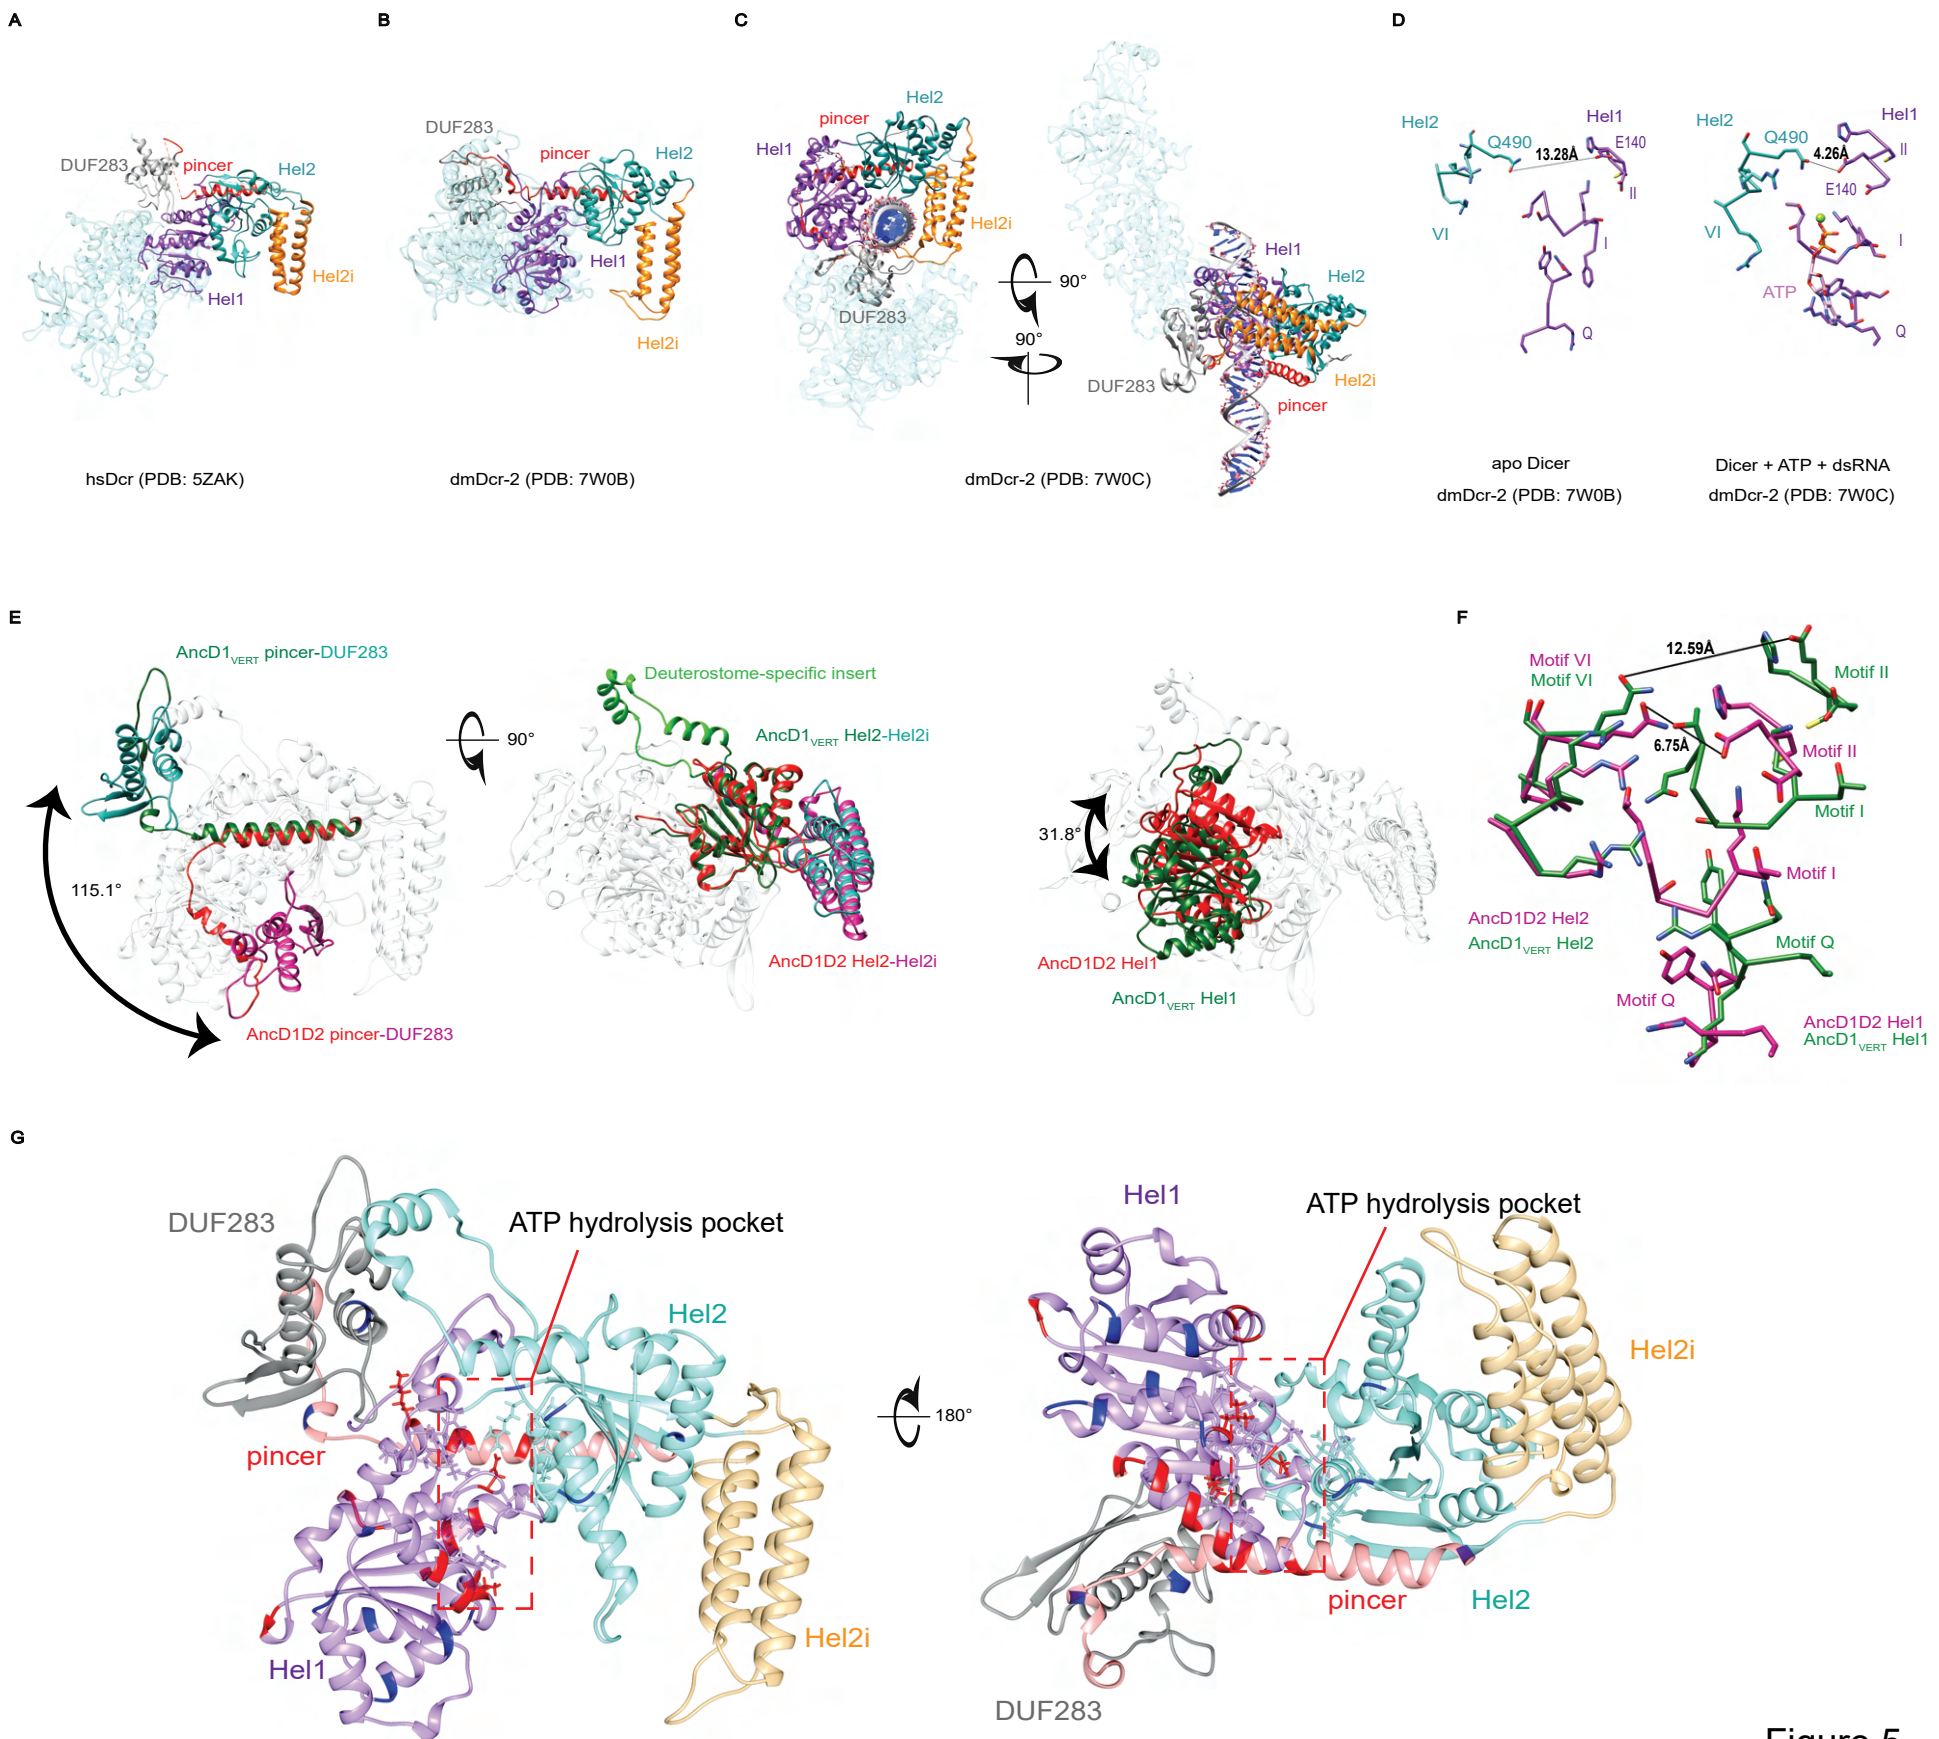

Figure 5

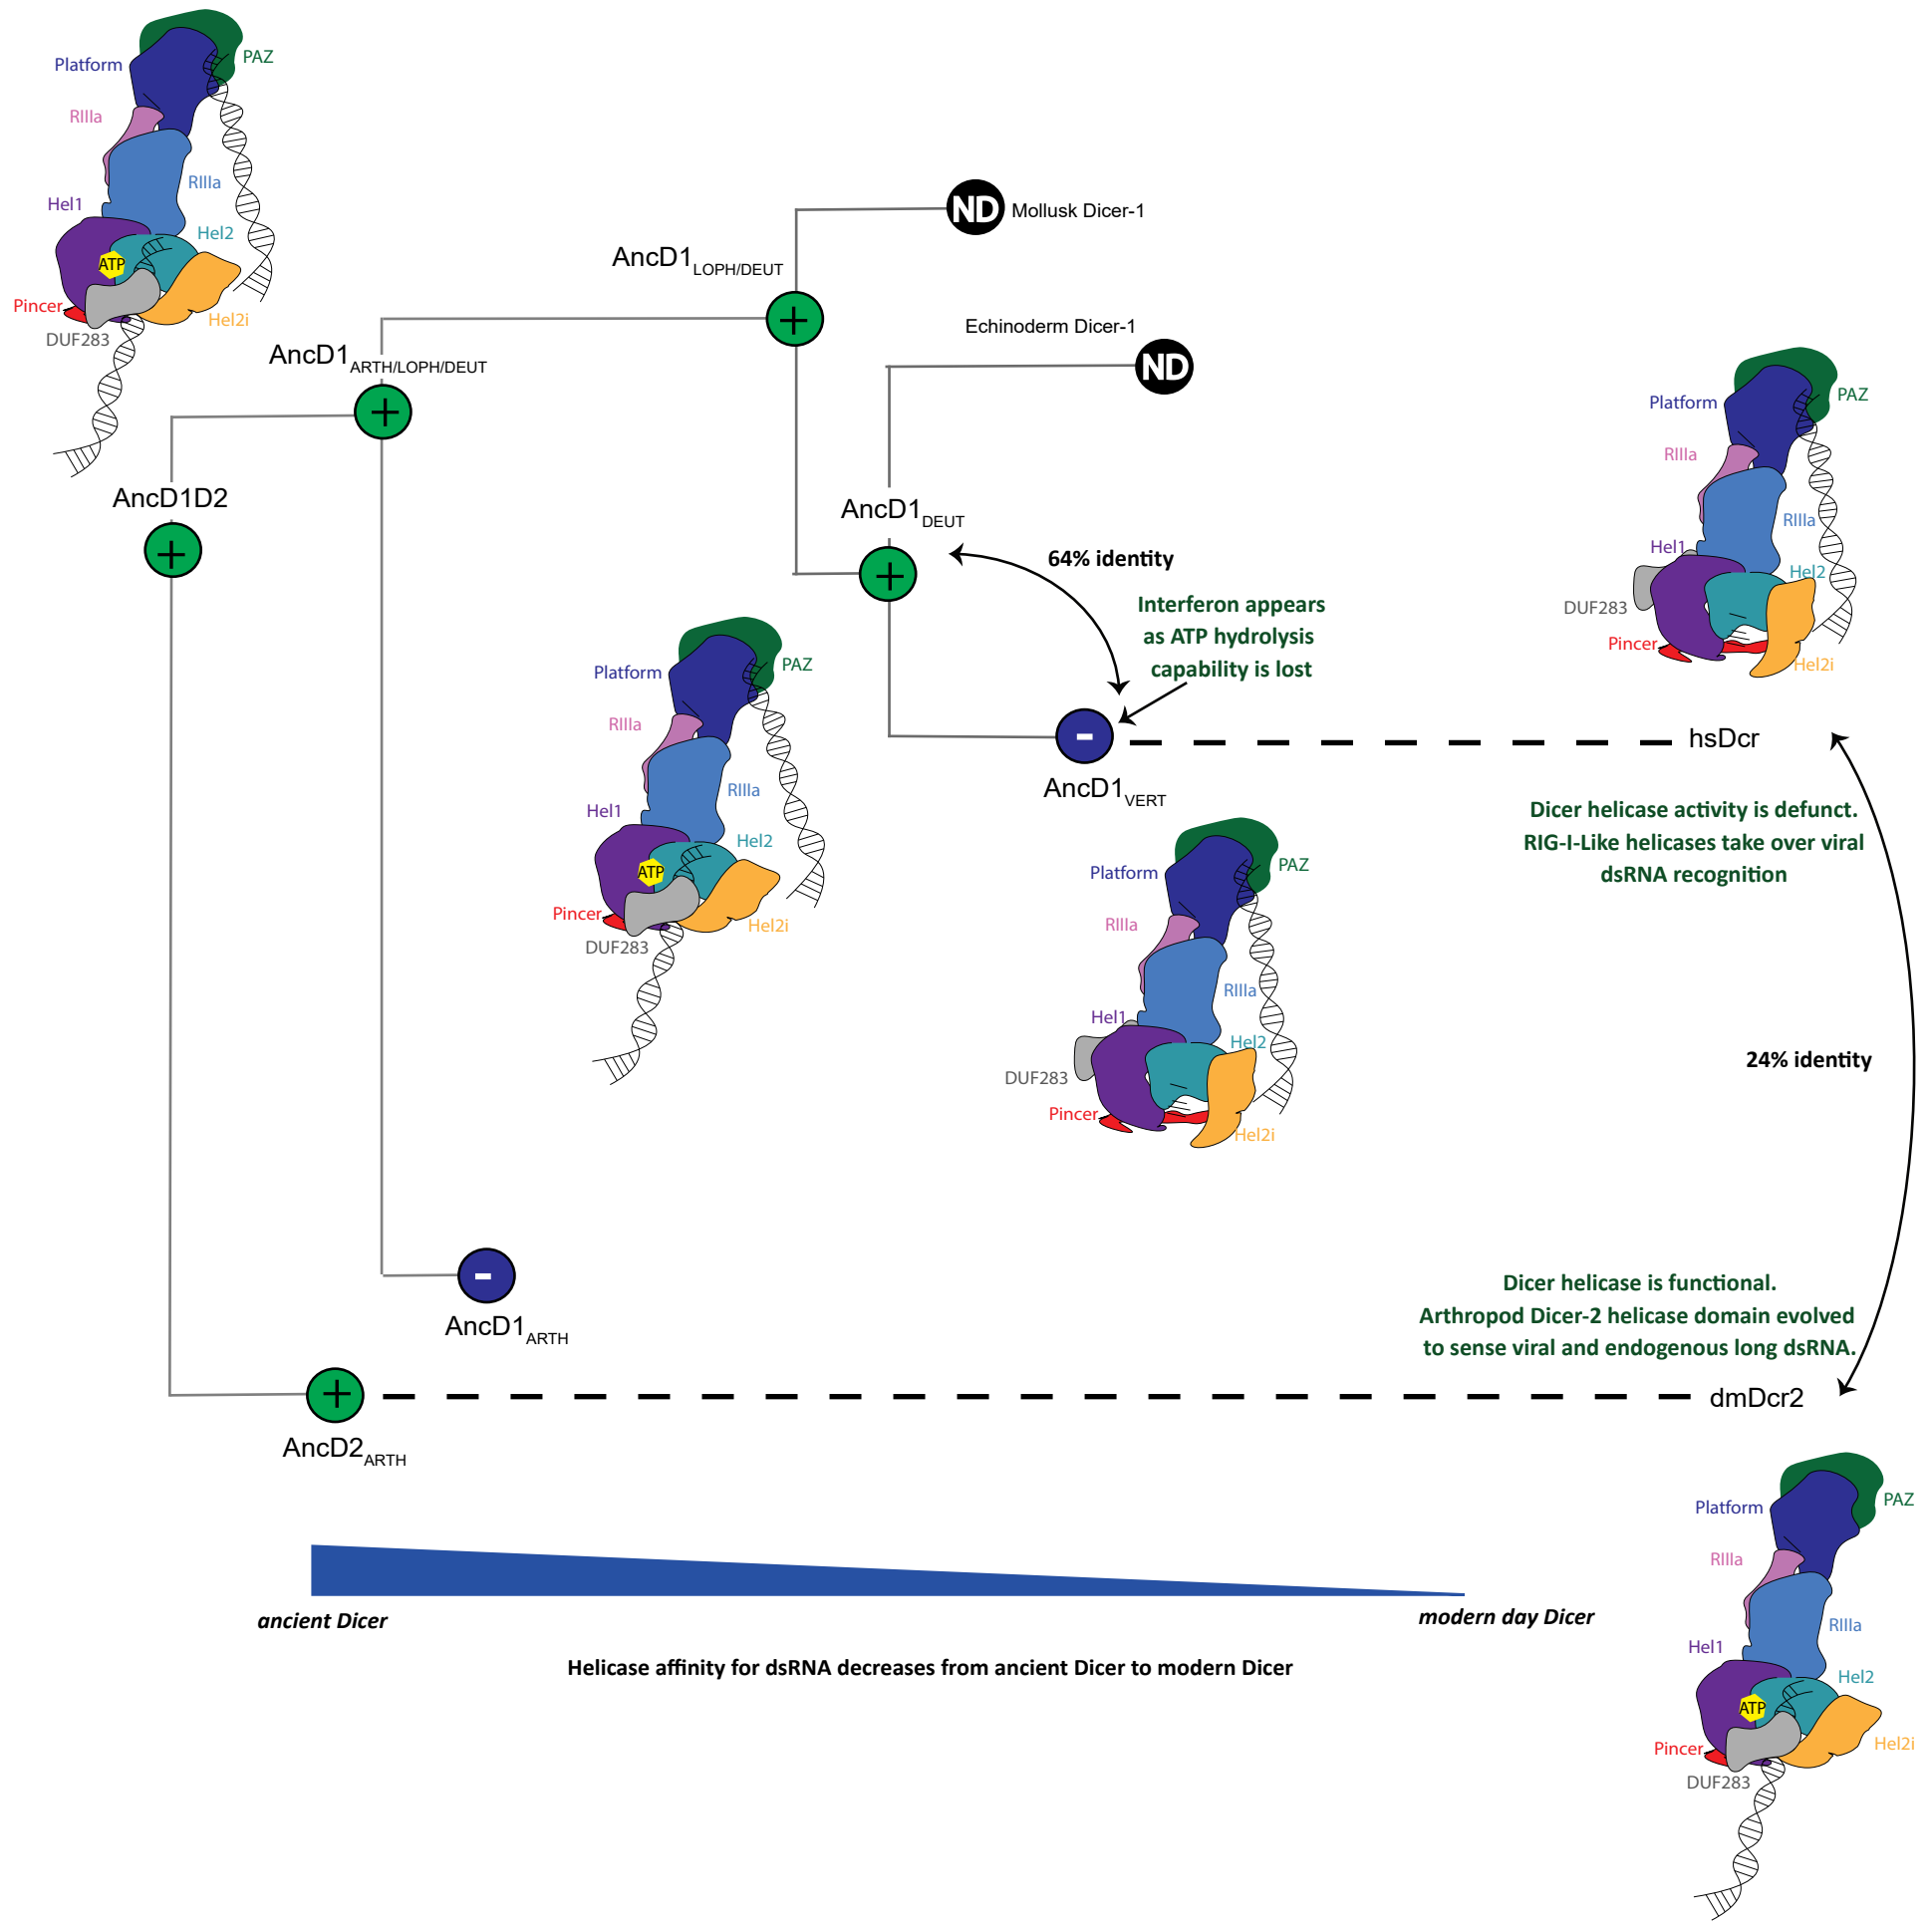

Figure 6
